# Supplementary material
Source: publisher site journal article supplement (https://www.dovepress.com/article/395922)
Supplement: Supplementary file 2 [file get_supplementary_file.php]

## **Supplement**

**[Supplementary – Introduction to SSA and TreeScan](#)**

**[Supplementary Fig. 1 Sequence symmetry analysis and TreeScan designs](#)**

**[Supplementary Table 1. Characteristics of SGLT2 inhibitor- and DPP4 inhibitor new users](#)**

**[Supplementary Table 2. Detected alerts of NFQs: Results from prescription sequence symmetry analysis](#)**

**[Supplementary Table 3. Detected alerts of NFQs: Results from propensity score-matched TreeScan](#)**

**[Supplementary Table 4. Risk profile of SGLT2 inhibitors](#)**

**[Supplementary Table 5. Risk profile of FQs and NFQs](#)**

**[Supplementary Table 6. Examples in different types of alerts](#)**

## Introduction to SSA and TreeScan

### Sequence symmetry analysis (SSA)

This study utilized prescription SSA. Prescription SSA (PSSA) assumes that if an ADR caused by an index drug can be treated, or the symptoms of the ADR could be relieved by a marker drug, then an imbalanced higher frequency would be found in the prescription sequence of index drug followed by marker drug, compared to the inverse sequence. Within a pre-specified screening time interval relative to the first prescription date of the index drug for a given population, the number of prescriptions with suspected causal sequence divided by the number of prescriptions with the inverse sequence yields the sequence ratio (SR) (See **Supplement, Fig. 1**). An SR greater than 1 implies that prescription of the index drug followed by prescription of the marker drug occurs more frequently than the other way around. In other words, an SR greater than one indicates that use of the index drug is associated with increased prescription of the marker drug, implying that the latter might be being used to treat potential AEs caused by the index drug. To further adjust for potential bias caused by the secular trend in drug prescription rate, a null-effect SR following Tsiropoulos' method [1] is used to generate an adjusted SR. The 95% confidence interval (CI) for the adjusted SR is derived using a normal approximation to the binomial distribution [2]. Details of the PSSA methodology are described in Hallas' [3] and Lai's [4] papers.

### Tree-based scan statistics (TreeScan)

The 'tree' in TreeScan refers to the data hierarchy to be mined or scanned. If one's aim is to mine the data for potential ADRs to a pre-specified index drug, then the tree can be understood as a diagnostic tree encoded by a specific coding system in a hierarchical manner. Each node on the tree represents a different group of events. After defining the diagnostic tree to be scanned, the TreeScan model calculates the likelihood for each node as well as nodes coded at a broader- and at a more granular level on the tree, under both the null and alternative hypotheses, whereby at least one node of the event occurs more frequently than in the rest of the tree. For instance, if the analysed event was coded as E11.1 in the ICD10-CM system, then in TreeScan a broader level of event coded as E11 and a more granular level of events coded as E11.10 and as E11.11 will be tested separately as well. The node with the maximum log likelihood ratio (LLR) is the most likely cluster of AEs. Following the Monte Carlo simulation, the distribution of test statistics under the null hypothesis is generated and the maximum LLR from the real dataset is ranked in the null distribution to obtain the p-value. Any event with a p-value less than a pre-specified significance level or a lower bound of 95% CI greater than 1 is considered as a significant alert. More information regarding methodology and statistics of TreeScan can be found in Kulldoff's [5] and Wang's [6] papers.

## Sequence symmetry analysis

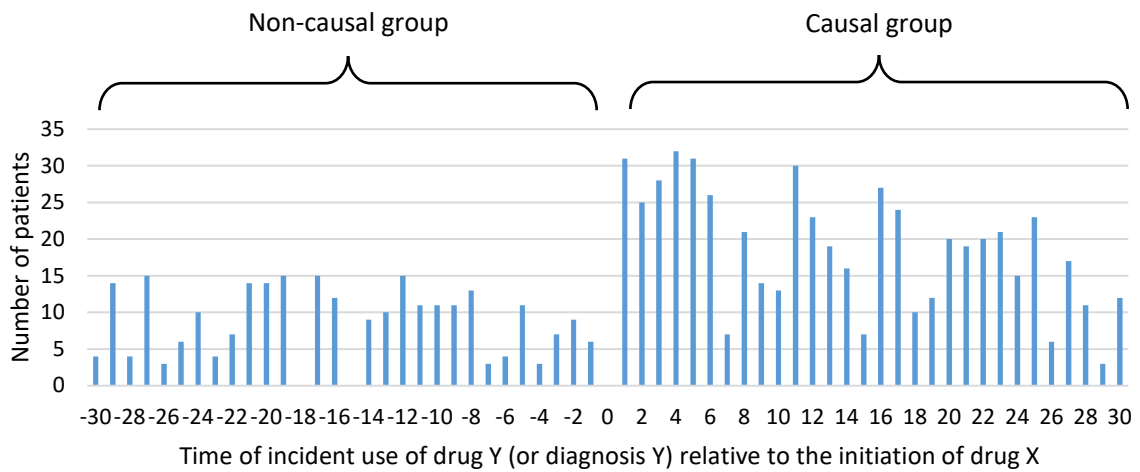

## Self-controlled design of TreeScan

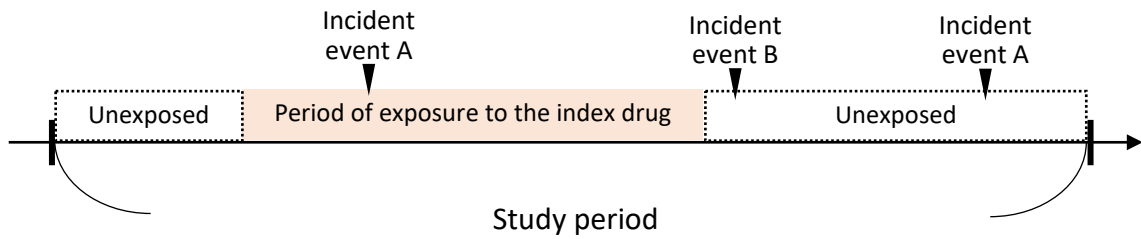

## Cohort design of TreeScan

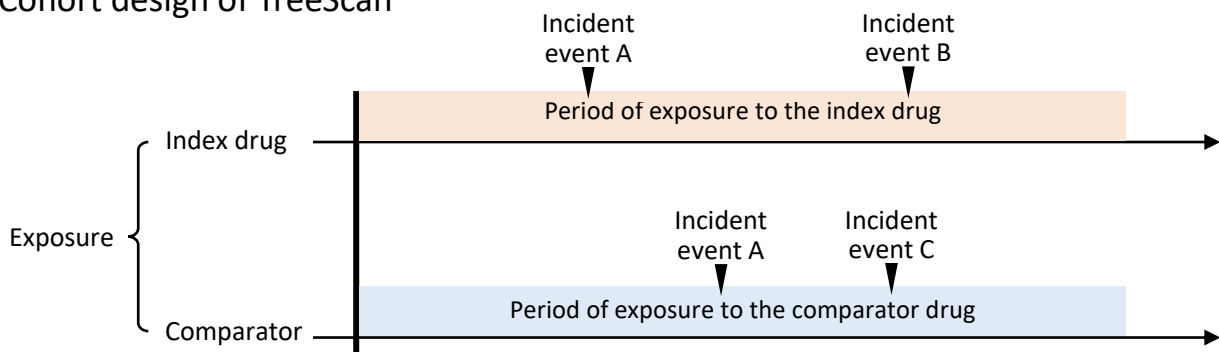

**Supplementary Fig. 1: Sequence symmetry analysis and TreeScan designs**

**Supplementary Table 1. Characteristics of SGLT2 inhibitor and DPP4 inhibitor new users**

|                                         | Before PS-matching |             |                |             | After PS-matching |             |                |             |
|-----------------------------------------|--------------------|-------------|----------------|-------------|-------------------|-------------|----------------|-------------|
|                                         | SGLT2 inhibitor    |             | DPP4 inhibitor |             | SGLT2 inhibitor   |             | DPP4 inhibitor |             |
|                                         | N                  | %           | N              | %           | N                 | %           | N              | %           |
| No. of patients                         | 138,611            | -           | 346,428        | -           | 118,308           | -           | 118,308        | -           |
| Age, mean<br>( $\pm$ SD)                | 58.15              | $\pm$ 12.12 | 62.73          | $\pm$ 13.76 | 58.91             | $\pm$ 12.01 | 58.81          | $\pm$ 12.91 |
| Male                                    | 76,233             | 55.00       | 188,074        | 54.29       | 64,676            | 54.67       | 64,398         | 54.43       |
| Frequency of outpatient visits per year |                    |             |                |             |                   |             |                |             |
| $\leq$ 26                               | 12,676             | 9.15        | 55,570         | 16.04       | 12,169            | 10.29       | 12,227         | 10.33       |
| 27-52                                   | 29,859             | 21.54       | 70,914         | 20.47       | 26,034            | 22.01       | 26,343         | 22.27       |
| 53-78                                   | 28,891             | 20.84       | 60,960         | 17.60       | 24,315            | 20.55       | 24,169         | 20.43       |
| $\geq$ 79                               | 66,935             | 48.29       | 154,412        | 44.57       | 55,547            | 46.95       | 55,382         | 46.81       |
| Admission of inpatient/ER               | 26,940             | 19.44       | 118,649        | 34.25       | 24,857            | 21.01       | 24,221         | 20.47       |
| CCI, mean<br>( $\pm$ SD)                | 2.61               | $\pm$ 1.65  | 2.86           | $\pm$ 2.09  | 2.61              | $\pm$ 1.68  | 3.00           | $\pm$ 1.71  |
| Comorbidity                             |                    |             |                |             |                   |             |                |             |
| Hypertension                            | 87,158             | 62.88       | 215,639        | 62.25       | 74,224            | 62.74       | 74,029         | 62.57       |
| Dyslipidaemia                           | 91,022             | 65.67       | 179,685        | 51.87       | 75,839            | 64.10       | 76,645         | 64.78       |
| a                                       |                    |             |                |             |                   |             |                |             |
| CAD                                     | 26,973             | 19.46       | 58,535         | 16.90       | 22,266            | 18.82       | 22,210         | 18.77       |
| PAD                                     | 2,645              | 1.91        | 7,778          | 2.25        | 2,268             | 1.92        | 2,287          | 1.93        |
| Heart failure                           | 6,075              | 4.38        | 20,333         | 5.87        | 5,303             | 4.48        | 5,259          | 4.45        |
| Ischemic stroke                         | 4,391              | 3.17        | 21,343         | 6.16        | 4,106             | 3.47        | 3,933          | 3.32        |
| Retinopathy                             | 14,614             | 10.54       | 25,416         | 7.34        | 11,509            | 9.73        | 11,483         | 9.71        |
| Nephropathy                             | 12,329             | 8.89        | 24,073         | 6.95        | 9,889             | 8.36        | 9,978          | 8.43        |
| Neuropathy                              | 26,301             | 18.97       | 53,314         | 15.39       | 21,002            | 17.75       | 20,721         | 17.51       |
| Liver cirrhosis                         | 1,323              | 0.95        | 6,336          | 1.83        | 1,231             | 1.04        | 1,178          | 1.00        |
| Cancer                                  | 13,115             | 9.46        | 41,632         | 12.02       | 11,532            | 9.75        | 11,527         | 9.74        |
| Co-medication (baseline)                |                    |             |                |             |                   |             |                |             |
| Anti-platelet                           | 47,718             | 34.43       | 115,344        | 33.30       | 40,077            | 33.88       | 39,981         | 33.79       |
| Beta-blocker                            | 47,950             | 34.59       | 113,201        | 32.68       | 40,270            | 34.04       | 39,882         | 33.71       |
| ACEI/ARB                                | 84,305             | 60.82       | 184,006        | 53.12       | 70,208            | 59.34       | 69,962         | 59.14       |
| CCB                                     | 40,716             | 29.37       | 131,158        | 37.86       | 36,480            | 30.83       | 36,342         | 30.72       |
| Diuretic                                | 21,442             | 15.47       | 75,866         | 21.90       | 19,028            | 16.08       | 18,725         | 15.83       |
| Statin                                  | 96,291             | 69.47       | 177,393        | 51.21       | 78,925            | 66.71       | 79,449         | 67.15       |
| Fibrate                                 | 18,159             | 13.10       | 34,591         | 9.99        | 14,913            | 12.61       | 14,924         | 12.61       |
| Metformin                               | 110,662            | 79.84       | 227,062        | 65.54       | 91,551            | 77.38       | 91,515         | 77.35       |
| Sulfonylurea                            | 71,825             | 51.82       | 148,933        | 42.99       | 60,243            | 50.92       | 60,610         | 51.23       |
| Glinide                                 | 8,840              | 6.38        | 27,700         | 8.00        | 7,597             | 6.42        | 7,524          | 6.36        |
| Acarbose                                | 29,200             | 21.07       | 40,806         | 11.78       | 21,748            | 18.38       | 21,720         | 18.36       |
| TZD                                     | 30,425             | 21.95       | 39,415         | 11.38       | 21,859            | 18.48       | 21,751         | 18.39       |
| GLP-1RA                                 | 2,556              | 1.84        | 1,194          | 0.34        | 1,213             | 1.03        | 1,031          | 0.87        |
| Insulin                                 | 38,215             | 27.57       | 90,000         | 25.98       | 29,506            | 24.94       | 28,507         | 24.10       |
| Concomitant OAD (index date)            |                    |             |                |             |                   |             |                |             |
| Metformin                               | 86,648             | 62.51       | 104,433        | 30.15       | 67,585            | 57.13       | 67,672         | 57.20       |
| Sulfonylurea                            | 48,941             | 35.31       | 91,164         | 26.32       | 40,439            | 34.18       | 40,187         | 33.97       |
| Glinide                                 | 4,347              | 3.14        | 15,017         | 4.33        | 3,795             | 3.21        | 3,758          | 3.18        |
| Acarbose                                | 16,840             | 12.15       | 20,025         | 5.78        | 12,085            | 10.21       | 11,858         | 10.02       |
| TZD                                     | 19,242             | 13.88       | 14,000         | 4.04        | 11,456            | 9.68        | 10,790         | 9.12        |
| GLP-1RA                                 | 291                | 0.21        | 75             | 0.02        | 100               | 0.08        | 70             | 0.06        |

|         |        |       |        |       |        |       |        |       |
|---------|--------|-------|--------|-------|--------|-------|--------|-------|
| Insulin | 25,552 | 18.43 | 36,625 | 10.57 | 18,072 | 15.28 | 17,418 | 14.72 |
|---------|--------|-------|--------|-------|--------|-------|--------|-------|

---

Abbreviations: CCI=Charlson Comorbidity Index; ER=emergency room; PS=propensity score.

**Supplementary Table 2. Detected alerts of NFQs: Results from prescription sequence symmetry analysis**

| Clinical classification*    | Type     | Marker drug | Name                             | Crude SR | Adjusted SR | 95% CI        | Pair No | FQ SSA | Corresponding findings in TreeScan                                |
|-----------------------------|----------|-------------|----------------------------------|----------|-------------|---------------|---------|--------|-------------------------------------------------------------------|
| Gastrointestinal<br>Anaemia | AD<br>R  | A02BC06     | Dexlansoprazole                  | 1.27     | 1.21        | (1.04 - 1.41) | 24941   |        | Dyspepsia and other specified disorders of stomach function       |
|                             | AD<br>R  | B03AB04     | Ferric hydroxide                 | 1.26     | 1.25        | (1.01 - 1.54) | 19760   |        |                                                                   |
| Lipid                       | AD<br>R  | B03AE01     | Iron, vitamin B12 and folic acid | 1.66     | 1.65        | (1.12 - 2.43) | 5478    | V      |                                                                   |
|                             | AD<br>R  | C10AA01     | Simvastatin                      | 1.69     | 1.79        | (1.24 - 2.59) | 13785   | V      |                                                                   |
| Nervous system              | AD<br>R  | N03AX16     | Pregabalin                       | 1.53     | 1.44        | (1.07 - 1.94) | 11536   | V      | Neuralgia, neuritis and radiculitis                               |
| Anti-inflammation           | AD<br>R  | M01AG04     | Meclofenamic acid                | 1.48     | 1.44        | (1.06 - 1.97) | 11266   |        | Lumbago, backache, sprains and strains of other parts of the back |
| Psychiatric                 | AD<br>R  | N06AA02     | Imipramine                       | 1.34     | 1.35        | (1.22 - 1.50) | 70661   | V      |                                                                   |
|                             | AD<br>R  | N06AA09     | Amitriptyline                    | 1.37     | 1.37        | (1.00 - 1.87) | 12786   |        |                                                                   |
|                             | AD<br>R  | N06AX11     | Mirtazapine                      | 1.39     | 1.37        | (1.08 - 1.73) | 15890   | V      |                                                                   |
| Eye                         | AD<br>Rr | S01HA02     | Oxybuprocaine                    | 1.27     | 1.28        | (1.01 - 1.64) | 17368   |        | Inflammation of eyelids, foreign body on external eye             |
| Urinary tract               | lr       | A12BA02     | Potassium citrate                | 1.39     | 1.38        | (1.04 - 1.84) | 6815    | V      | Calculus of kidney, ureter, lower urinary tract                   |
|                             | lr       | G04BD04     | Oxybutynin                       | 1.31     | 1.34        | (1.23 - 1.46) | 118349  |        | Neurogenic bladder, other                                         |
|                             | lr       | G04BD06     | Propiverine                      | 1.68     | 1.69        | (1.29 - 2.23) | 9143    | V      | functional disorder of the bladder                                |
|                             | lr       | G04BD07     | Tolterodine                      | 1.63     | 1.63        | (1.43 - 1.87) | 40911   | V      |                                                                   |
|                             | lr       | G04BD08     | Solifenacin                      | 2.14     | 2.12        | (1.79 - 2.51) | 29423   | V      |                                                                   |
|                             | lr       | G04BD12     | Mirabegron                       | 2.36     | 2.25        | (1.81 - 2.79) | 11363   | V      |                                                                   |
|                             | lr       | H01BA02     | Desmopressin                     | 1.63     | 1.64        | (1.31 - 2.07) | 12528   | V      |                                                                   |
| Genital tract               | lr       | D01BA02     | Terbinafine                      | 1.26     | 1.22        | (1.00 - 1.48) | 16170   |        | Candidiasis                                                       |
|                             | lr       | G01AF07     | Isoconazole                      | 1.30     | 1.26        | (1.01 - 1.57) | 18671   |        |                                                                   |
|                             | lr       | G01AF12     | Fenticonazole                    | 1.75     | 1.56        | (1.26 - 1.93) | 14975   | V      |                                                                   |
| Respiratory                 | lr       | J02AC01     | Fluconazole                      | 1.48     | 1.44        | (1.20 - 1.74) | 18046   | V      |                                                                   |
|                             | lr       | R06AA08     | Carbinoxamine                    | 1.81     | 1.56        | (1.07 - 2.27) | 7343    |        |                                                                   |
|                             | lr       | R06AA57     | Diphenylpyraline, combinations   | 1.28     | 1.51        | (1.02 - 2.25) | 6926    |        |                                                                   |
|                             | CH       | B05XA05     | Magnesium sulfate                | 1.36     | 1.31        | (1.00 - 1.70) | 9785    |        | Complications of pregnancy                                        |

|                                                  |    |         |                                  |      |      |               |        |   |                                                                                                                   |
|--------------------------------------------------|----|---------|----------------------------------|------|------|---------------|--------|---|-------------------------------------------------------------------------------------------------------------------|
| Pregnancy/<br>menstrual<br>cycle                 | CH | G03DA04 | Progesterone                     | 1.19 | 1.22 | (1.08 - 1.37) | 59999  | V | Abortion, conditions associated<br>with menstrual cycle,<br>menopausal and other<br>perimenopausal disorders      |
| Medications<br>used in critical<br>care / fluids | CH | A06AD11 | Lactulose                        | 1.23 | 1.20 | (1.05 - 1.38) | 33641  | V |                                                                                                                   |
|                                                  | CH | A06AD17 | Sodium phosphate                 | 1.23 | 1.23 | (1.10 - 1.38) | 56549  |   |                                                                                                                   |
|                                                  | CH | A03AB02 | Glycopyrronium bromide           | 1.74 | 1.68 | (1.08 - 2.62) | 4149   |   |                                                                                                                   |
|                                                  | CH | A03BA01 | Atropine                         | 1.61 | 1.63 | (1.27 - 2.08) | 11448  | V |                                                                                                                   |
|                                                  | CH | B01AB01 | Heparin                          | 1.27 | 1.26 | (1.08 - 1.48) | 29677  |   |                                                                                                                   |
|                                                  | CH | B03XA02 | Darbepoetin alfa                 | 1.74 | 1.78 | (1.01 - 3.13) | 3058   | V |                                                                                                                   |
|                                                  | CH | B05BA01 | Amino acids                      | 1.39 | 1.33 | (1.07 - 1.65) | 12071  |   |                                                                                                                   |
|                                                  | CH | B05BA10 | Combinations                     | 1.51 | 1.54 | (1.13 - 2.11) | 6984   |   |                                                                                                                   |
|                                                  | CH | B05CB01 | Sodium chloride                  | 1.45 | 1.41 | (1.18 - 1.69) | 18536  | V |                                                                                                                   |
|                                                  | CH | C01BB01 | Lidocaine                        | 1.42 | 1.38 | (1.19 - 1.60) | 34670  |   |                                                                                                                   |
|                                                  | CH | C01CA03 | Norepinephrine                   | 1.38 | 1.31 | (1.07 - 1.61) | 13274  | V |                                                                                                                   |
|                                                  | CH | C01CA04 | Dopamine                         | 1.85 | 1.83 | (1.44 - 2.33) | 12016  | V |                                                                                                                   |
|                                                  | CH | C01CA24 | Epinephrine                      | 1.59 | 1.60 | (1.39 - 1.84) | 37290  | V |                                                                                                                   |
|                                                  | CH | H01BA06 | Argipressin                      | 1.55 | 1.53 | (1.03 - 2.27) | 4600   | V |                                                                                                                   |
| Broad-<br>spectrum<br>antibiotics                | CH | N01AX10 | Propofol                         | 1.24 | 1.23 | (1.06 - 1.43) | 23058  |   |                                                                                                                   |
|                                                  | CH | N07AA01 | Neostigmine                      | 1.36 | 1.38 | (1.10 - 1.73) | 14068  |   |                                                                                                                   |
|                                                  | CH | J01AA12 | Tigecycline                      | 2.24 | 2.18 | (1.23 - 3.86) | 2000   | V |                                                                                                                   |
|                                                  | CH | J01CR04 | Sultamicillin                    | 1.52 | 1.43 | (1.20 - 1.71) | 19026  |   |                                                                                                                   |
|                                                  | CH | J01DD01 | Cefotaxime                       | 1.97 | 1.83 | (1.18 - 2.85) | 3417   |   |                                                                                                                   |
|                                                  | CH | J01DD02 | Ceftazidime                      | 1.32 | 1.31 | (1.09 - 1.56) | 17086  | V |                                                                                                                   |
|                                                  | CH | J01DD08 | Cefixime                         | 1.54 | 1.45 | (1.26 - 1.68) | 32316  | V |                                                                                                                   |
|                                                  | CH | J01DD14 | Ceftibuten                       | 1.31 | 1.27 | (1.11 - 1.45) | 33260  | V |                                                                                                                   |
|                                                  | CH | J01DE01 | Cefepime                         | 1.61 | 1.54 | (1.19 - 2.00) | 8227   | V |                                                                                                                   |
|                                                  | CH | J01DH02 | Meropenem                        | 1.78 | 1.67 | (1.23 - 2.27) | 6910   | V |                                                                                                                   |
|                                                  | CH | J01DH03 | Ertapenem                        | 1.33 | 1.31 | (1.07 - 1.61) | 13595  | V |                                                                                                                   |
|                                                  | CH | J01DH51 | Imipenem and enzyme<br>inhibitor | 1.51 | 1.44 | (1.07 - 1.95) | 6031   | V |                                                                                                                   |
|                                                  | CH | J01MA02 | Ciprofloxacin                    | 1.19 | 1.20 | (1.11 - 1.30) | 102764 |   |                                                                                                                   |
|                                                  | CH | J01XA02 | Teicoplanin                      | 1.60 | 1.54 | (1.13 - 2.08) | 7344   | V |                                                                                                                   |
| Cancer-<br>related                               | CH | J01XB01 | Colistin                         | 1.82 | 1.66 | (1.05 - 2.64) | 2489   | V |                                                                                                                   |
|                                                  | CH | J01XX08 | Linezolid                        | 2.71 | 2.50 | (1.05 - 5.95) | 1048   | V |                                                                                                                   |
|                                                  | CH | J04AK01 | Pyrazinamide                     | 2.89 | 2.94 | (1.38 - 6.28) | 1293   | V |                                                                                                                   |
|                                                  | CH | J04AK02 | Ethambutol                       | 3.50 | 3.56 | (1.76 - 7.19) | 2316   | V |                                                                                                                   |
|                                                  | CH | J04AM02 | Rifampicin and isoniazid         | 3.11 | 3.15 | (1.48 - 6.67) | 2249   | V |                                                                                                                   |
|                                                  | CH | A04AA02 | Granisetron                      | 2.16 | 2.19 | (1.48 - 3.23) | 4128   |   | Malignant neoplasm of breast,<br>bladder, kidney and other<br>unspecified urinary organs,<br>genitourinary system |
|                                                  | CH | A04AA05 | Palonosetron                     | 3.21 | 3.16 | (2.20 - 4.55) | 5511   |   |                                                                                                                   |
|                                                  | CH | A04AD12 | Aprepitant                       | 3.04 | 3.12 | (1.97 - 4.95) | 3801   |   |                                                                                                                   |
|                                                  | CH | L01BC02 | Fluorouracil                     | 3.00 | 3.08 | (1.94 - 4.90) | 3945   |   |                                                                                                                   |
|                                                  | CH | L01BC05 | Gemcitabine                      | 3.07 | 3.06 | (1.71 - 5.49) | 1697   |   |                                                                                                                   |

|    |         |                  |      |      |               |      |   |
|----|---------|------------------|------|------|---------------|------|---|
| CH | L01BC06 | Capecitabine     | 2.20 | 2.19 | (1.03 - 4.61) | 1460 | V |
| CH | L01DB01 | Doxorubicin      | 2.29 | 2.18 | (1.16 - 4.09) | 2537 |   |
| CH | L01DB03 | Epirubicin       | 2.05 | 2.04 | (1.21 - 3.43) | 2706 |   |
| CH | L01DC03 | Mitomycin        | 2.42 | 2.24 | (1.42 - 3.53) | 2930 |   |
| CH | L01XA01 | Cisplatin        | 3.41 | 3.48 | (2.35 - 5.16) | 4493 |   |
| CH | L01XA02 | Carboplatin      | 2.88 | 2.83 | (1.63 - 4.91) | 1633 |   |
| CH | L02AB01 | Megestrol        | 1.82 | 1.74 | (1.29 - 2.34) | 6735 |   |
| CH | L02AE02 | Leuprorelin      | 5.21 | 5.28 | (3.23 - 8.62) | 2342 | V |
| CH | L02AE03 | Goserelin        | 3.00 | 3.14 | (1.14 - 8.63) | 806  | V |
| CH | L02BB03 | Bicalutamide     | 7.78 | 8.00 | (4.00 - 16.0) | 2107 | V |
| CH | L03AX03 | BCG vaccine      | 3.17 | 2.93 | (1.17 - 7.33) | 591  |   |
| CH | L03AA02 | Filgrastim       | 1.83 | 1.81 | (1.09 - 3.01) | 2538 |   |
| CH | L03AA10 | Lenograstim      | 2.43 | 2.42 | (1.00 - 5.83) | 1331 |   |
| CH | M05BA03 | Pamidronic acid  | 5.00 | 5.23 | (1.15 - 23.9) | 416  | V |
| CH | M05BA08 | Zoledronic acid  | 1.74 | 1.78 | (1.07 - 2.98) | 3124 | V |
| CH | N02AA03 | Hydromorphone    | 3.20 | 3.03 | (1.11 - 8.28) | 646  |   |
| CH | N02AA05 | Oxycodone        | 3.89 | 2.38 | (1.14 - 4.95) | 1571 |   |
| CH | N02AB03 | Fentanyl         | 3.65 | 3.49 | (2.20 - 5.54) | 4476 | V |
| CH | V03AF03 | Calcium folinate | 2.16 | 2.06 | (1.28 - 3.31) | 3438 | V |

\*Clinical classification was expressed in either disease or medication system.

Abbreviation: ADR=known adverse drug reaction; ADRr=events related to known adverse drug reaction; CH=cohort-related; I=indication; Ir=indication-related; PT=protopathic bias; S=signal.



**Supplementary Table 3. Detected alerts of NFQs: Results from propensity score-matched TreeScan**

| Clinical classification* | Type  | Node† | Tree level                 | ICD 9 Diagnosis                                                   | Observations | Cases | Expected | RR     | LLR    | P-value |
|--------------------------|-------|-------|----------------------------|-------------------------------------------------------------------|--------------|-------|----------|--------|--------|---------|
| Infections               | I     | 0085  | 2                          | Bacterial enteritis, unspecified                                  | 1221         | 729   | 610.5    | 1.19   | 23.15  | 0.0001  |
|                          | I     | 0093  | 2                          | Diarrhoea of presumed infectious origin                           | 3935         | 2105  | 1967.5   | 1.07   | 9.62   | 0.0446  |
|                          | I     | 098   | 1                          | Gonococcal infections                                             | 548          | 334   | 274      | 1.22   | 13.25  | 0.0011  |
|                          | I     | 099   | 1                          | Other venereal diseases                                           | 1239         | 916   | 619.5    | 1.48   | 147.89 | 0.0001  |
|                          | Ir    | 112   | 1                          | Candidiasis                                                       | 22970        | 12950 | 11485    | 1.13   | 187.38 | 0.0001  |
|                          | Ir    | 122   | 1                          | Echinococcosis                                                    | 38           | 35    | 19       | 1.84   | 15.84  | 0.0003  |
|                          | Ir    | 131   | 1                          | Trichomoniasis                                                    | 2613         | 1757  | 1306.5   | 1.34   | 158.57 | 0.0001  |
|                          | I     | 0994  | 2                          | Other nongonococcal urethritis [ NGU ]                            | 838          | 678   | 419      | 1.62   | 172.27 | 0.0001  |
|                          | Ir    | 1121  | 2                          | Candidiasis of vulva and vagina                                   | 17277        | 10519 | 8638.5   | 1.22   | 412.66 | 0.0001  |
|                          | Ir    | 1221  | 2                          | Echinococcus granulosus infection of lung                         | 38           | 35    | 19       | 1.84   | 15.84  | 0.0003  |
|                          | Ir    | 1310  | 2                          | Urogenital trichomoniasis                                         | 2539         | 1714  | 1269.5   | 1.35   | 158.98 | 0.0001  |
|                          | Ir    | 1341  | 2                          | Other arthropod infestation                                       | 93           | 69    | 46.5     | 1.48   | 11.36  | 0.0061  |
|                          | I     | 09940 | 3                          | Other unspecified nongonococcal urethritis                        | 732          | 618   | 366      | 1.69   | 190.77 | 0.0001  |
|                          | Ir    | 13100 | 3                          | Urogenital trichomoniasis, unspecified                            | 571          | 373   | 285.5    | 1.31   | 27.25  | 0.0001  |
| Ir                       | 13101 | 3     | Trichomonal vulvovaginitis | 1927                                                              | 1321         | 963.5 | 1.37     | 135.87 | 0.0001 |         |
| Neoplasms                | PT    | 188   | 1                          | Malignant neoplasm of bladder                                     | 2440         | 1678  | 1220     | 1.38   | 176.22 | 0.0001  |
|                          | PT    | 189   | 1                          | Malignant neoplasm of kidney and other unspecified urinary organs | 1424         | 861   | 712      | 1.21   | 31.41  | 0.0001  |
|                          | PT    | 218   | 1                          | Uterine leiomyoma                                                 | 11674        | 6498  | 5837     | 1.11   | 75.01  | 0.0001  |
|                          | PT    | 219   | 1                          | Other benign neoplasm of uterus                                   | 2413         | 1322  | 1206.5   | 1.1    | 11.07  | 0.01    |
|                          | PT    | 220   | 1                          | Benign neoplasm of ovary                                          | 6035         | 3372  | 3017.5   | 1.12   | 41.74  | 0.0001  |
|                          | PT    | 223   | 1                          | Benign neoplasm of kidney and other urinary organs                | 903          | 568   | 451.5    | 1.26   | 30.40  | 0.0001  |
|                          | PT    | 233   | 1                          | Carcinoma in situ of breast and genitourinary system              | 637          | 376   | 318.5    | 1.18   | 10.44  | 0.0172  |
|                          | PT    | 1882  | 2                          | Malignant neoplasm of lateral wall of urinary bladder             | 342          | 249   | 171      | 1.46   | 36.93  | 0.0001  |
|                          | PT    | 1884  | 2                          | Malignant neoplasm of posterior wall of urinary bladder           | 87           | 70    | 43.5     | 1.61   | 17.33  | 0.0001  |
|                          | PT    | 1889  | 2                          | Malignant neoplasm of bladder, part unspecified                   | 1403         | 971   | 701.5    | 1.38   | 106.25 | 0.0001  |
|                          | PT    | 1891  | 2                          | Malignant neoplasm of renal pelvis                                | 411          | 265   | 205.5    | 1.29   | 17.48  | 0.0001  |
|                          | PT    | 1892  | 2                          | Malignant neoplasm of ureter                                      | 346          | 228   | 173      | 1.32   | 17.79  | 0.0001  |
|                          | PT    | 2189  | 2                          | Leiomyoma of uterus, unspecified                                  | 9045         | 5091  | 4522.5   | 1.13   | 71.65  | 0.0001  |
|                          | PT    | 2219  | 2                          | Benign neoplasm of female genital organ, site unspecified         | 153          | 104   | 76.5     | 1.36   | 10.11  | 0.0252  |
|                          | PT    | 2233  | 2                          | Benign neoplasm of bladder                                        | 151          | 117   | 75.5     | 1.55   | 24.13  | 0.0001  |
|                          | PT    | 2239  | 2                          | Benign neoplasm of urinary organs, site unspecified               | 88           | 65    | 44       | 1.48   | 10.44  | 0.0169  |

|                |               |       |     |                                                                |                                                                |       |         |       |        |        |        |
|----------------|---------------|-------|-----|----------------------------------------------------------------|----------------------------------------------------------------|-------|---------|-------|--------|--------|--------|
| Eye disorders  | PT            | 2298  | 2   | Benign neoplasm of other specified sites                       | 513                                                            | 311   | 256.5   | 1.21  | 11.67  | 0.0047 |        |
|                | PT            | 2394  | 2   | Neoplasm of unspecified nature of bladder                      | 315                                                            | 218   | 157.5   | 1.38  | 23.85  | 0.0001 |        |
|                | PT            | 6117  | 2   | Signs and symptoms in breast                                   | 3320                                                           | 1823  | 1660    | 1.1   | 16.03  | 0.0003 |        |
|                | ADR           | 368   | 1   | Visual disturbances                                            | 16124                                                          | 8428  | 8062    | 1.05  | 16.62  | 0.0001 |        |
|                | ADRr          | 370   | 1   | Keratitis                                                      | 19086                                                          | 9892  | 9543    | 1.04  | 12.77  | 0.0019 |        |
|                | ADRr          | 372   | 1   | Disorders of conjunctiva                                       | 114719                                                         | 59233 | 57359.5 | 1.03  | 61.20  | 0.0001 |        |
|                | ADRr          | 373   | 1   | Inflammation of eyelids                                        | 25175                                                          | 13492 | 12587.5 | 1.07  | 65.05  | 0.0001 |        |
|                | ADRr          | 930   | 1   | Foreign body on external eye                                   | 13350                                                          | 7159  | 6675    | 1.07  | 35.13  | 0.0001 |        |
|                | ADR           | 3681  | 2   | Subjective visual disturbances                                 | 15499                                                          | 8128  | 7749.5  | 1.05  | 18.49  | 0.0001 |        |
|                | ADRr          | 3702  | 2   | Superficial keratitis without conjunctivitis                   | 12012                                                          | 6279  | 6006    | 1.05  | 12.41  | 0.0028 |        |
|                | ADRr          | 3721  | 2   | Chronic conjunctivitis                                         | 52817                                                          | 27432 | 26408.5 | 1.04  | 39.68  | 0.0001 |        |
|                | ADRr          | 3725  | 2   | Conjunctival degenerations and deposits                        | 5653                                                           | 3000  | 2826.5  | 1.06  | 10.66  | 0.0133 |        |
|                | ADRr          | 3730  | 2   | Blepharitis                                                    | 5620                                                           | 2984  | 2810    | 1.06  | 10.78  | 0.0122 |        |
|                | ADRr          | 3731  | 2   | Hordeolum and other deep inflammation of eyelid                | 16073                                                          | 8668  | 8036.5  | 1.08  | 49.67  | 0.0001 |        |
| Nervous System | ADRr          | 9301  | 2   | Foreign body in conjunctival sac                               | 8768                                                           | 4729  | 4384    | 1.08  | 27.18  | 0.0001 |        |
|                | ADRr          | 36813 | 3   | Visual discomfort                                              | 15281                                                          | 8008  | 7640.5  | 1.05  | 17.68  | 0.0001 |        |
|                | ADRr          | 37021 | 3   | Punctate keratitis                                             | 7671                                                           | 4058  | 3835.5  | 1.06  | 12.91  | 0.0015 |        |
|                | ADRr          | 37210 | 3   | Chronic conjunctivitis, unspecified                            | 24643                                                          | 12899 | 12321.5 | 1.05  | 27.08  | 0.0001 |        |
|                | ADRr          | 37254 | 3   | Conjunctival concretions                                       | 3569                                                           | 1943  | 1784.5  | 1.09  | 14.10  | 0.0006 |        |
|                | ADRr          | 37312 | 3   | Hordeolum internum                                             | 8454                                                           | 4657  | 4227    | 1.1   | 43.82  | 0.0001 |        |
|                | ADRr          | 37991 | 3   | Pain in or around eye                                          | 630                                                            | 387   | 315     | 1.23  | 16.60  | 0.0001 |        |
|                | ADRr          | 344   | 1   | Other paralytic syndromes                                      | 2867                                                           | 1639  | 1433.5  | 1.14  | 29.56  | 0.0001 |        |
|                | ADRr          | 3446  | 2   | Cauda equina syndrome                                          | 1416                                                           | 1014  | 708     | 1.43  | 136.71 | 0.0001 |        |
|                | ADR           | 3499  | 2   | Unspecified disorders of nervous system                        | 1413                                                           | 801   | 706.5   | 1.13  | 12.68  | 0.0019 |        |
|                | ADR           | 7292  | 2   | Neuralgia, neuritis and radiculitis, unspecified               | 12932                                                          | 6927  | 6466    | 1.07  | 32.90  | 0.0001 |        |
|                | ADRr          | 34461 | 3   | Cauda equina syndrome with neurogenic bladder                  | 1297                                                           | 948   | 648.5   | 1.46  | 143.71 | 0.0001 |        |
|                | Ear disorders | Ir    | 384 | 1                                                              | Other disorders of tympanic membrane                           | 1439  | 808     | 719.5 | 1.12   | 10.91  | 0.0114 |
|                |               | ADR   | 386 | 1                                                              | Vertiginous syndromes and other disorders of vestibular system | 25716 | 13738   | 12858 | 1.07   | 60.27  | 0.0001 |
| Ir             |               | 3809  | 2   | Unspecified disorder of external ear                           | 488                                                            | 293   | 244     | 1.2   | 9.91   | 0.0294 |        |
| I              |               | 3814  | 2   | Nonsuppurative otitis media, not specified as acute or chronic | 1922                                                           | 1067  | 961     | 1.11  | 11.72  | 0.0047 |        |
| I              |               | 3821  | 2   | Chronic tubotympanic suppurative otitis media                  | 495                                                            | 407   | 247.5   | 1.64  | 111.44 | 0.0001 |        |
| ADRr           |               | 3860  | 2   | Meniere's disease                                              | 4231                                                           | 2483  | 2115.5  | 1.17  | 64.17  | 0.0001 |        |
| ADRr           |               | 3861  | 2   | Other and unspecified peripheral vertigo                       | 12876                                                          | 6729  | 6438    | 1.05  | 13.16  | 0.0013 |        |
| ADRr           |               | 3869  | 2   | Unspecified vertiginous syndromes and labyrinthine disorders   | 5637                                                           | 2995  | 2818.5  | 1.06  | 11.06  | 0.0101 |        |
| ADR            |               | 3883  | 2   | Tinnitus                                                       | 10988                                                          | 5791  | 5494    | 1.05  | 16.06  | 0.0003 |        |
| Ir             |               | 8726  | 2   | Open wound to other specified parts of ear,                    | 116                                                            | 83    | 58      | 1.43  | 11.14  | 0.008  |        |

|                         |      |       |                                 |                                                                |        |       |         |      |        |        |
|-------------------------|------|-------|---------------------------------|----------------------------------------------------------------|--------|-------|---------|------|--------|--------|
|                         |      |       | without mention of complication |                                                                |        |       |         |      |        |        |
|                         | Ir   | 38011 | 3                               | Acute infection of pinna                                       | 545    | 491   | 272.5   | 1.8  | 201.70 | 0.0001 |
|                         | Ir   | 38013 | 3                               | Other acute infection of external ear                          | 549    | 330   | 274.5   | 1.2  | 11.30  | 0.0063 |
|                         | Ir   | 38015 | 3                               | Chronic mycotic otitis externa                                 | 3160   | 1704  | 1580    | 1.08 | 9.74   | 0.036  |
|                         | I    | 38100 | 3                               | Acute nonsuppurative otitis media, unspecified                 | 1477   | 832   | 738.5   | 1.13 | 11.87  | 0.0041 |
|                         | ADRr | 38600 | 3                               | Meniere's disease, unspecified                                 | 3809   | 2275  | 1904.5  | 1.19 | 72.54  | 0.0001 |
|                         | ADRr | 38612 | 3                               | Vestibular neuronitis                                          | 2049   | 1201  | 1024.5  | 1.17 | 30.56  | 0.0001 |
|                         | ADR  | 38831 | 3                               | Subjective tinnitus                                            | 1153   | 826   | 576.5   | 1.43 | 111.63 | 0.0001 |
|                         | Ir   | 87202 | 3                               | Open wound of auditory canal, without mention of complication  | 79     | 64    | 39.5    | 1.62 | 16.36  | 0.0003 |
|                         | Ir   | 87261 | 3                               | Open wound of ear drum, without mention of complication        | 116    | 83    | 58      | 1.43 | 11.14  | 0.008  |
|                         | ADRr | V721  | 2                               | Examination of ears and hearing                                | 331    | 207   | 165.5   | 1.25 | 10.52  | 0.0157 |
| Respiratory System      | Ir   | 4610  | 2                               | Acute sinusitis of maxillary                                   | 7544   | 4365  | 3772    | 1.16 | 93.61  | 0.0001 |
|                         | I    | 4618  | 2                               | Other acute sinusitis                                          | 9047   | 4780  | 4523.5  | 1.06 | 14.55  | 0.0004 |
|                         | Ir   | 4642  | 2                               | Acute laryngotracheitis                                        | 13675  | 7678  | 6837.5  | 1.12 | 103.58 | 0.0001 |
|                         | Ir   | 4732  | 2                               | Chronic sinusitis of ethmoidal                                 | 236    | 153   | 118     | 1.3  | 10.54  | 0.0147 |
|                         | Ir   | 4760  | 2                               | Chronic laryngitis                                             | 888    | 511   | 444     | 1.15 | 10.15  | 0.0239 |
|                         | Ir   | 4770  | 2                               | Allergic rhinitis due to pollen                                | 1334   | 932   | 667     | 1.4  | 108.25 | 0.0001 |
|                         | Ir   | 46420 | 3                               | Acute laryngotracheitis without mention of obstruction         | 13263  | 7468  | 6631.5  | 1.13 | 105.80 | 0.0001 |
|                         | Ir   | 46611 | 3                               | Acute bronchiolitis due to respiratory syncytial virus (RSV)   | 4509   | 3056  | 2254.5  | 1.36 | 291.27 | 0.0001 |
| Skin disorders          | ADR  | 698   | 1                               | Pruritus and related conditions                                | 50119  | 26590 | 25059.5 | 1.06 | 93.53  | 0.0001 |
|                         | ADRr | 6962  | 2                               | Parapsoriasis                                                  | 205    | 157   | 102.5   | 1.53 | 30.53  | 0.0001 |
| Oral Cavity             | Ir   | 523   | 1                               | Gingival and periodontal diseases                              | 43803  | 22396 | 21901.5 | 1.02 | 11.17  | 0.0079 |
|                         | Ir   | 5233  | 2                               | Acute periodontitis                                            | 14062  | 7311  | 7031    | 1.04 | 11.15  | 0.0079 |
|                         | Ir   | 5296  | 2                               | Glossodynia                                                    | 122    | 89    | 61      | 1.46 | 13.35  | 0.0011 |
| Gastrointestinal System | ADR  | 535   | 1                               | Gastritis and duodenitis                                       | 86456  | 44325 | 43228   | 1.03 | 27.84  | 0.0001 |
|                         | ADRr | 536   | 1                               | Disorders of function of the stomach                           | 62350  | 32265 | 31175   | 1.03 | 38.12  | 0.0001 |
|                         | I    | 555   | 1                               | Regional enteritis                                             | 6338   | 3812  | 3169    | 1.2  | 131.38 | 0.0001 |
|                         | Ir   | 558   | 1                               | Other non-infectious gastroenteritis and colitis               | 73235  | 38302 | 36617.5 | 1.05 | 77.52  | 0.0001 |
|                         | ADR  | 564   | 1                               | Functional digestive disorders, not elsewhere classified       | 82488  | 42664 | 41244   | 1.03 | 48.90  | 0.0001 |
|                         | ADRr | 787   | 1                               | Symptoms involving digestive system                            | 55518  | 28587 | 27759   | 1.03 | 24.70  | 0.0001 |
|                         | ADRr | 789   | 1                               | Other symptoms involving abdomen and pelvis                    | 108872 | 60248 | 54436   | 1.11 | 621.72 | 0.0001 |
|                         | ADR  | 5350  | 2                               | Acute gastritis                                                | 43936  | 22500 | 21968   | 1.02 | 12.88  | 0.0016 |
|                         | ADR  | 5355  | 2                               | Unspecified gastritis and gastroduodenitis                     | 30924  | 16268 | 15462   | 1.05 | 42.03  | 0.0001 |
|                         | ADR  | 5368  | 2                               | Dyspepsia and other specified disorders of function of stomach | 25107  | 13199 | 12553.5 | 1.05 | 33.21  | 0.0001 |

|                      |      |       |   |                                                                                                                     |        |        |         |      |          |        |
|----------------------|------|-------|---|---------------------------------------------------------------------------------------------------------------------|--------|--------|---------|------|----------|--------|
| Genitourinary System | ADDr | 5369  | 2 | Unspecified functional disorder of stomach                                                                          | 36117  | 18497  | 18058.5 | 1.02 | 10.65    | 0.0137 |
|                      | ADDr | 5509  | 2 | Inguinal hernia, without mention of obstruction or gangrene                                                         | 1686   | 940    | 843     | 1.12 | 11.19    | 0.0071 |
|                      | I    | 5550  | 2 | Regional enteritis, small intestine                                                                                 | 1362   | 943    | 681     | 1.38 | 103.45   | 0.0001 |
|                      | I    | 5559  | 2 | Regional enteritis, unspecified site                                                                                | 3316   | 1952   | 1658    | 1.18 | 52.41    | 0.0001 |
|                      | Ir   | 5589  | 2 | Other and unspecified non-infectious gastroenteritis and colitis                                                    | 72120  | 37804  | 36060   | 1.05 | 84.38    | 0.0001 |
|                      | ADR  | 5645  | 2 | Functional diarrhoea                                                                                                | 3921   | 2102   | 1960.5  | 1.07 | 10.22    | 0.0229 |
|                      | ADDr | 5649  | 2 | Unspecified functional disorder of intestine                                                                        | 23471  | 13104  | 11735.5 | 1.12 | 159.95   | 0.0001 |
|                      | ADR  | 7873  | 2 | Flatulence, eructation, and gas pain                                                                                | 22247  | 11994  | 11123.5 | 1.08 | 68.19    | 0.0001 |
|                      | Ir   | 7890  | 2 | Abdominal pain                                                                                                      | 104618 | 58152  | 52309   | 1.11 | 654.04   | 0.0001 |
|                      | Ir   | 7899  | 2 | Other symptoms involving abdomen and pelvis                                                                         | 1081   | 851    | 540.5   | 1.57 | 189.77   | 0.0001 |
|                      | ADR  | 53500 | 3 | Acute gastritis, without mention of haemorrhage                                                                     | 42723  | 21898  | 21361.5 | 1.03 | 13.48    | 0.0009 |
|                      | ADR  | 53550 | 3 | Unspecified gastritis and gastroduodenitis, without mention of haemorrhage                                          | 29996  | 15782  | 14998   | 1.05 | 41.00    | 0.0001 |
|                      | ADDr | 55090 | 3 | Inguinal hernia, without mention of obstruction or gangrene, unilateral or unspecified (not specified as recurrent) | 1357   | 781    | 678.5   | 1.15 | 15.54    | 0.0003 |
|                      | ADDr | 78799 | 3 | Other symptoms involving digestive system                                                                           | 1545   | 948    | 772.5   | 1.23 | 40.22    | 0.0001 |
|                      | Ir   | 78900 | 3 | Abdominal pain, unspecified site                                                                                    | 65982  | 37408  | 32991   | 1.13 | 593.15   | 0.0001 |
|                      | Ir   | 78904 | 3 | Abdominal pain, left lower quadrant                                                                                 | 2329   | 1346   | 1164.5  | 1.16 | 28.40    | 0.0001 |
|                      | Ir   | 78905 | 3 | Abdominal pain, periumbilical                                                                                       | 2248   | 1235   | 1124    | 1.1  | 10.98    | 0.0108 |
|                      | Ir   | 78907 | 3 | Abdominal pain, generalized                                                                                         | 2015   | 1249   | 1007.5  | 1.24 | 58.46    | 0.0001 |
|                      | Ir   | 78909 | 3 | Abdominal pain, other specified site                                                                                | 11020  | 5970   | 5510    | 1.08 | 38.45    | 0.0001 |
|                      | Ir   | 591   | 1 | Hydronephrosis                                                                                                      | 16783  | 10728  | 8391.5  | 1.28 | 659.25   | 0.0001 |
|                      | Ir   | 592   | 1 | Calculus of kidney and ureter                                                                                       | 51814  | 35052  | 25907   | 1.35 | 3298.75  | 0.0001 |
|                      | Ir   | 594   | 1 | Calculus of lower urinary tract                                                                                     | 3089   | 2155   | 1544.5  | 1.4  | 248.03   | 0.0001 |
|                      | I    | 595   | 1 | Cystitis                                                                                                            | 123955 | 89321  | 61977.5 | 1.44 | 12488.96 | 0.0001 |
|                      | Ir   | 596   | 1 | Other disorders of bladder                                                                                          | 16525  | 10772  | 8262.5  | 1.3  | 774.36   | 0.0001 |
|                      | I    | 597   | 1 | Urethritis, not sexually transmitted, and urethral syndrome                                                         | 22032  | 14260  | 11016   | 1.29 | 969.61   | 0.0001 |
|                      | Ir   | 598   | 1 | Urethral stricture                                                                                                  | 1234   | 806    | 617     | 1.31 | 58.84    | 0.0001 |
|                      | Ir   | 599   | 1 | Other disorders of urethra and urinary tract                                                                        | 197264 | 120469 | 98632   | 1.22 | 4874.98  | 0.0001 |
|                      | Ir   | 600   | 1 | Hyperplasia of prostate                                                                                             | 29423  | 16999  | 14711.5 | 1.16 | 357.13   | 0.0001 |
|                      | I    | 601   | 1 | Inflammatory diseases of prostate                                                                                   | 15838  | 9168   | 7919    | 1.16 | 197.82   | 0.0001 |
|                      | Ir   | 605   | 1 | Redundant prepuce and phimosis                                                                                      | 859    | 541    | 429.5   | 1.26 | 29.28    | 0.0001 |
|                      | Ir   | 607   | 1 | Disorders of penis                                                                                                  | 3825   | 2325   | 1912.5  | 1.22 | 89.67    | 0.0001 |
|                      | Ir   | 614   | 1 | Inflammatory disease of ovary, fallopian tube, pelvic cellular tissue and peritoneum                                | 41848  | 24058  | 20924   | 1.15 | 471.18   | 0.0001 |
|                      | Ir   | 615   | 1 | Inflammatory diseases of uterus, except cervix                                                                      | 7632   | 4874   | 3816    | 1.28 | 297.21   | 0.0001 |

|    |      |   |                                                                                 |        |       |         |      |         |        |
|----|------|---|---------------------------------------------------------------------------------|--------|-------|---------|------|---------|--------|
| Ir | 616  | 1 | Inflammatory disease of cervix, vagina and vulva                                | 108405 | 67147 | 54202.5 | 1.24 | 3121.45 | 0.0001 |
| PT | 617  | 1 | Endometriosis                                                                   | 6745   | 3597  | 3372.5  | 1.07 | 14.96   | 0.0003 |
| PT | 618  | 1 | Genital prolapse                                                                | 2521   | 1523  | 1260.5  | 1.21 | 55.07   | 0.0001 |
| PT | 621  | 1 | Disorders of uterus, not elsewhere classified                                   | 3749   | 2101  | 1874.5  | 1.12 | 27.44   | 0.0001 |
| PT | 622  | 1 | Noninflammatory disorders of cervix                                             | 11522  | 6528  | 5761    | 1.13 | 102.42  | 0.0001 |
| PT | 623  | 1 | Noninflammatory disorders of vagina                                             | 10738  | 6036  | 5369    | 1.12 | 83.08   | 0.0001 |
| PT | 625  | 1 | Pain and other symptoms associated with female genital organs                   | 15434  | 8810  | 7717    | 1.14 | 155.33  | 0.0001 |
| PT | 626  | 1 | Disorders of menstruation and other abnormal bleeding from female genital tract | 79850  | 44933 | 39925   | 1.13 | 629.84  | 0.0001 |
| PT | 627  | 1 | Menopausal and postmenopausal disorders                                         | 17856  | 10458 | 8928    | 1.17 | 263.50  | 0.0001 |
| PT | 628  | 1 | Infertility, female                                                             | 3414   | 1898  | 1707    | 1.11 | 21.42   | 0.0001 |
| PT | 629  | 1 | Other disorders of female genital organs                                        | 1393   | 875   | 696.5   | 1.26 | 46.26   | 0.0001 |
| Ir | 788  | 1 | Symptoms involving urinary system                                               | 93881  | 61360 | 46940.5 | 1.31 | 4501.91 | 0.0001 |
| PT | 2568 | 2 | Other ovarian dysfunction                                                       | 258    | 166   | 129     | 1.29 | 10.76   | 0.0123 |
| I  | 5900 | 2 | Chronic pyelonephritis                                                          | 1007   | 697   | 503.5   | 1.38 | 76.31   | 0.0001 |
| Ir | 5920 | 2 | Calculus of kidney                                                              | 19249  | 12716 | 9624.5  | 1.32 | 1010.85 | 0.0001 |
| Ir | 5921 | 2 | Calculus of ureter                                                              | 20917  | 14431 | 10458.5 | 1.38 | 1547.45 | 0.0001 |
| Ir | 5929 | 2 | Urinary calculus, unspecified                                                   | 11319  | 7752  | 5659.5  | 1.37 | 792.33  | 0.0001 |
| Ir | 5932 | 2 | Cyst of kidney, acquired                                                        | 1187   | 683   | 593.5   | 1.15 | 13.55   | 0.0009 |
| Ir | 5933 | 2 | Stricture or kinking of ureter                                                  | 1938   | 1324  | 969     | 1.37 | 133.13  | 0.0001 |
| Ir | 5940 | 2 | Calculus in diverticulum of the bladder                                         | 162    | 131   | 81      | 1.62 | 33.20   | 0.0001 |
| Ir | 5941 | 2 | Other calculus in bladder                                                       | 2073   | 1445  | 1036.5  | 1.39 | 165.45  | 0.0001 |
| Ir | 5942 | 2 | Calculus in urethra                                                             | 620    | 435   | 310     | 1.4  | 51.87   | 0.0001 |
| I  | 5950 | 2 | Acute cystitis                                                                  | 80283  | 58182 | 40141.5 | 1.45 | 8405.53 | 0.0001 |
| I  | 5951 | 2 | Chronic interstitial cystitis                                                   | 1441   | 948   | 720.5   | 1.32 | 73.08   | 0.0001 |
| I  | 5958 | 2 | Other specified types of cystitis                                               | 970    | 614   | 485     | 1.27 | 34.73   | 0.0001 |
| I  | 5959 | 2 | Cystitis, unspecified                                                           | 38413  | 28167 | 19206.5 | 1.47 | 4347.02 | 0.0001 |
| Ir | 5960 | 2 | Bladder neck obstruction                                                        | 799    | 571   | 399.5   | 1.43 | 76.07   | 0.0001 |
| Ir | 5964 | 2 | Atony of bladder                                                                | 1132   | 690   | 566     | 1.22 | 27.39   | 0.0001 |
| Ir | 5965 | 2 | Other functional disorders of the bladder                                       | 12215  | 8008  | 6107.5  | 1.31 | 601.32  | 0.0001 |
| Ir | 5968 | 2 | Other specified disorders of the bladder                                        | 1226   | 792   | 613     | 1.29 | 53.04   | 0.0001 |
| Ir | 5969 | 2 | Unspecified disorder of the bladder                                             | 770    | 488   | 385     | 1.27 | 27.89   | 0.0001 |
| I  | 5970 | 2 | Urethral abscess                                                                | 1470   | 913   | 735     | 1.24 | 43.54   | 0.0001 |
| I  | 5978 | 2 | Other urethritis                                                                | 20254  | 13154 | 10127   | 1.3  | 918.76  | 0.0001 |
| Ir | 5989 | 2 | Urethral stricture, unspecified                                                 | 1024   | 682   | 512     | 1.33 | 57.53   | 0.0001 |
| I  | 5990 | 2 | Urinary tract infection, site not specified                                     | 158462 | 94992 | 79231   | 1.2  | 3156.26 | 0.0001 |
| Ir | 5993 | 2 | Urethral caruncle                                                               | 152    | 110   | 76      | 1.45 | 15.76   | 0.0003 |
| Ir | 5997 | 2 | Haematuria                                                                      | 31748  | 21294 | 15874   | 1.34 | 1888.35 | 0.0001 |
| Ir | 5999 | 2 | Unspecified disorder of urethra and urinary tract                               | 3727   | 2512  | 1863.5  | 1.35 | 230.47  | 0.0001 |
| Ir | 6000 | 2 | Hypertrophy (benign) of prostate                                                | 21122  | 12447 | 10561   | 1.18 | 338.62  | 0.0001 |

|    |      |   |                                                                      |       |       |         |      |         |        |
|----|------|---|----------------------------------------------------------------------|-------|-------|---------|------|---------|--------|
| Ir | 6009 | 2 | Hyperplasia of prostate, unspecified                                 | 6142  | 3503  | 3071    | 1.14 | 60.97   | 0.0001 |
| I  | 6011 | 2 | Chronic prostatitis                                                  | 6020  | 3703  | 3010    | 1.23 | 160.99  | 0.0001 |
| I  | 6013 | 2 | Prostatocystitis                                                     | 271   | 191   | 135.5   | 1.41 | 23.42   | 0.0001 |
| I  | 6019 | 2 | Prostatitis, unspecified                                             | 4418  | 2601  | 2209    | 1.18 | 69.93   | 0.0001 |
| Ir | 6071 | 2 | Balanoposthitis                                                      | 2277  | 1392  | 1138.5  | 1.22 | 56.92   | 0.0001 |
| Ir | 6078 | 2 | Other specified disorder of penis                                    | 1089  | 654   | 544.5   | 1.2  | 22.17   | 0.0001 |
| Ir | 6145 | 2 | Acute or unspecified pelvic peritonitis, female                      | 3389  | 2059  | 1694.5  | 1.22 | 79.02   | 0.0001 |
| Ir | 6149 | 2 | Unspecified inflammatory disease of female pelvic organs and tissues | 24800 | 15164 | 12400   | 1.22 | 621.31  | 0.0001 |
| Ir | 6150 | 2 | Acute inflammatory diseases of uterus, except cervix                 | 1781  | 1267  | 890.5   | 1.42 | 164.30  | 0.0001 |
| Ir | 6159 | 2 | Unspecified inflammatory disease of the uterus                       | 5735  | 3550  | 2867.5  | 1.24 | 164.01  | 0.0001 |
| Ir | 6160 | 2 | Cervicitis and endocervicitis                                        | 8645  | 5228  | 4322.5  | 1.21 | 191.10  | 0.0001 |
| Ir | 6161 | 2 | Vaginitis and vulvovaginitis                                         | 53739 | 34329 | 26869.5 | 1.28 | 2098.36 | 0.0001 |
| Ir | 6165 | 2 | Ulceration of vulva                                                  | 2043  | 1220  | 1021.5  | 1.19 | 38.82   | 0.0001 |
| Ir | 6168 | 2 | Other specified inflammatory diseases of cervix, vagina, and vulva   | 2037  | 1122  | 1018.5  | 1.1  | 10.54   | 0.0147 |
| Ir | 6169 | 2 | Unspecified inflammatory disease of cervix, vagina, and vulva        | 39263 | 23950 | 19631.5 | 1.22 | 957.79  | 0.0001 |
| PT | 6179 | 2 | Endometriosis, site unspecified                                      | 1545  | 865   | 772.5   | 1.12 | 11.10   | 0.0083 |
| PT | 6180 | 2 | Prolapse of vaginal walls, without mention of uterine prolapse       | 790   | 465   | 395     | 1.18 | 12.47   | 0.0027 |
| PT | 6184 | 2 | Uterovaginal prolapse, unspecified                                   | 429   | 277   | 214.5   | 1.29 | 18.48   | 0.0001 |
| PT | 6189 | 2 | Unspecified genital prolapse                                         | 327   | 205   | 163.5   | 1.25 | 10.65   | 0.0137 |
| PT | 6202 | 2 | Other and unspecified ovarian cyst                                   | 5750  | 3046  | 2875    | 1.06 | 10.18   | 0.0236 |
| PT | 6214 | 2 | Hematometra                                                          | 280   | 185   | 140     | 1.32 | 14.72   | 0.0003 |
| PT | 6220 | 2 | Erosion and ectropion of cervix                                      | 7267  | 4052  | 3633.5  | 1.12 | 48.31   | 0.0001 |
| PT | 6221 | 2 | Dysplasia of cervix (uteri)                                          | 2568  | 1531  | 1284    | 1.19 | 47.81   | 0.0001 |
| PT | 6225 | 2 | Incompetence of cervix                                               | 44    | 39    | 22      | 1.77 | 14.92   | 0.0003 |
| PT | 6227 | 2 | Mucous polyp of cervix                                               | 1305  | 757   | 652.5   | 1.16 | 16.81   | 0.0001 |
| PT | 6235 | 2 | Leukorrhea, not specified as infective                               | 10153 | 5669  | 5076.5  | 1.12 | 69.31   | 0.0001 |
| PT | 6239 | 2 | Unspecified noninflammatory disorder of vagina                       | 289   | 209   | 144.5   | 1.45 | 29.83   | 0.0001 |
| PT | 6250 | 2 | Dyspareunia                                                          | 257   | 169   | 128.5   | 1.32 | 12.98   | 0.0014 |
| PT | 6253 | 2 | Dysmenorrhea                                                         | 9159  | 4969  | 4579.5  | 1.09 | 33.17   | 0.0001 |
| PT | 6256 | 2 | Stress incontinence, female                                          | 2922  | 1946  | 1461    | 1.33 | 164.10  | 0.0001 |
| PT | 6259 | 2 | Unspecified symptom associated with female genital organs            | 698   | 446   | 349     | 1.28 | 27.32   | 0.0001 |
| PT | 6260 | 2 | Absence of menstruation                                              | 13852 | 8370  | 6926    | 1.21 | 303.28  | 0.0001 |
| PT | 6264 | 2 | Irregular menstrual cycle                                            | 22246 | 11923 | 11123   | 1.07 | 57.59   | 0.0001 |
| PT | 6266 | 2 | Metrorrhagia                                                         | 7004  | 3992  | 3502    | 1.14 | 68.79   | 0.0001 |

|    |       |   |                                                                                            |       |       |        |      |         |        |
|----|-------|---|--------------------------------------------------------------------------------------------|-------|-------|--------|------|---------|--------|
| PT | 6268  | 2 | Other disorders of menstruation and other abnormal bleeding from female genital tract      | 12123 | 7130  | 6061.5 | 1.18 | 189.34  | 0.0001 |
| PT | 6269  | 2 | Unspecified disorder of menstruation and other abnormal bleeding from female genital tract | 14660 | 8235  | 7330   | 1.12 | 112.02  | 0.0001 |
| PT | 6271  | 2 | Postmenopausal bleeding                                                                    | 1136  | 670   | 568    | 1.18 | 18.42   | 0.0001 |
| PT | 6272  | 2 | Menopausal or female climacteric states                                                    | 9765  | 5591  | 4882.5 | 1.15 | 103.17  | 0.0001 |
| PT | 6273  | 2 | Postmenopausal atrophic vaginitis                                                          | 3342  | 2051  | 1671   | 1.23 | 87.18   | 0.0001 |
| PT | 6274  | 2 | States associated with artificial menopause                                                | 107   | 84    | 53.5   | 1.57 | 18.48   | 0.0001 |
| PT | 6279  | 2 | Unspecified menopausal and postmenopausal disorder                                         | 2919  | 1752  | 1459.5 | 1.2  | 59.02   | 0.0001 |
| PT | 6289  | 2 | Infertility, female, of unspecified origin                                                 | 1581  | 891   | 790.5  | 1.13 | 12.81   | 0.0019 |
| PT | 6298  | 2 | Other specified disorders of female genital organs                                         | 689   | 440   | 344.5  | 1.28 | 26.82   | 0.0001 |
| PT | 6299  | 2 | Unspecified disorder of female genital organs                                              | 704   | 435   | 352    | 1.24 | 19.76   | 0.0001 |
| Ir | 6981  | 2 | Pruritus of genital organs                                                                 | 14610 | 8816  | 7305   | 1.21 | 314.81  | 0.0001 |
| Ir | 7880  | 2 | Renal colic                                                                                | 6605  | 4571  | 3302.5 | 1.38 | 499.98  | 0.0001 |
| Ir | 7881  | 2 | Dysuria                                                                                    | 12760 | 8492  | 6380   | 1.33 | 712.51  | 0.0001 |
| Ir | 7882  | 2 | Retention of urine                                                                         | 10082 | 5786  | 5041   | 1.15 | 110.51  | 0.0001 |
| Ir | 7883  | 2 | Incontinence of urine                                                                      | 16264 | 10881 | 8132   | 1.34 | 947.85  | 0.0001 |
| Ir | 7884  | 2 | Frequency of urination and polyuria                                                        | 44142 | 29057 | 22071  | 1.32 | 2249.72 | 0.0001 |
| Ir | 7886  | 2 | Other abnormality of urination                                                             | 1314  | 860   | 657    | 1.31 | 63.76   | 0.0001 |
| Ir | 7888  | 2 | Extravasation of urine                                                                     | 518   | 458   | 259    | 1.77 | 173.33  | 0.0001 |
| Ir | 7889  | 2 | Other symptoms involving urinary system                                                    | 1609  | 910   | 804.5  | 1.13 | 13.87   | 0.0006 |
| PT | 7950  | 2 | Nonspecific abnormal Papanicolaou smear of cervix                                          | 270   | 181   | 135    | 1.34 | 15.99   | 0.0003 |
| I  | 59000 | 3 | Chronic pyelonephritis without lesion of renal medullary necrosis                          | 959   | 675   | 479.5  | 1.41 | 82.08   | 0.0001 |
| Ir | 59389 | 3 | Other specified disorders of kidney and ureter                                             | 689   | 404   | 344.5  | 1.17 | 10.33   | 0.0215 |
| I  | 59589 | 3 | Other specified types of cystitis                                                          | 722   | 470   | 361    | 1.3  | 33.43   | 0.0001 |
| Ir | 59651 | 3 | Hypertonicity of bladder                                                                   | 2959  | 2106  | 1479.5 | 1.42 | 273.85  | 0.0001 |
| Ir | 59654 | 3 | Neurogenic bladder NOS                                                                     | 5327  | 3373  | 2663.5 | 1.27 | 191.30  | 0.0001 |
| Ir | 59655 | 3 | Detrusor sphincter dyssynergia                                                             | 217   | 146   | 108.5  | 1.35 | 13.23   | 0.0011 |
| Ir | 59659 | 3 | Other functional disorder of bladder                                                       | 3367  | 2176  | 1683.5 | 1.29 | 146.21  | 0.0001 |
| I  | 59780 | 3 | Urethritis, unspecified                                                                    | 17044 | 11311 | 8522   | 1.33 | 929.79  | 0.0001 |
| Ir | 59781 | 3 | Urethral syndrome NOS                                                                      | 805   | 489   | 402.5  | 1.21 | 18.74   | 0.0001 |
| I  | 59789 | 3 | Other urethritis                                                                           | 2278  | 1270  | 1139   | 1.12 | 15.10   | 0.0003 |
| Ir | 59983 | 3 | Urethral instability                                                                       | 111   | 84    | 55.5   | 1.51 | 15.36   | 0.0003 |
| Ir | 59984 | 3 | Other specified disorders of urethra                                                       | 161   | 109   | 80.5   | 1.35 | 10.31   | 0.0217 |
| Ir | 60490 | 3 | Orchitis and epididymitis, unspecified                                                     | 4331  | 2325  | 2165.5 | 1.07 | 11.76   | 0.0047 |
| Ir | 60491 | 3 | Orchitis and epididymitis in diseases                                                      | 167   | 115   | 83.5   | 1.38 | 12.18   | 0.0033 |

|                             |    |       |                      |                                                                                                                                |       |       |         |      |         |        |
|-----------------------------|----|-------|----------------------|--------------------------------------------------------------------------------------------------------------------------------|-------|-------|---------|------|---------|--------|
|                             |    |       | classified elsewhere |                                                                                                                                |       |       |         |      |         |        |
|                             | Ir | 60784 | 3                    | Impotence of organic origin                                                                                                    | 923   | 562   | 461.5   | 1.22 | 22.06   | 0.0001 |
|                             | Ir | 61610 | 3                    | Vaginitis and vulvovaginitis, unspecified                                                                                      | 43869 | 27401 | 21934.5 | 1.25 | 1376.82 | 0.0001 |
|                             | Ir | 61611 | 3                    | Vaginitis and vulvovaginitis in diseases<br>classified elsewhere                                                               | 9148  | 6598  | 4574    | 1.44 | 927.41  | 0.0001 |
|                             | Ir | 61650 | 3                    | Ulceration of vulva, unspecified                                                                                               | 1868  | 1137  | 934     | 1.22 | 44.48   | 0.0001 |
|                             | Ir | 78820 | 3                    | Retention of urine, unspecified                                                                                                | 7731  | 4376  | 3865.5  | 1.13 | 67.62   | 0.0001 |
|                             | Ir | 78821 | 3                    | Incomplete bladder emptying                                                                                                    | 1254  | 765   | 627     | 1.22 | 30.62   | 0.0001 |
|                             | Ir | 78829 | 3                    | Other specified retention of urine                                                                                             | 752   | 459   | 376     | 1.22 | 18.47   | 0.0001 |
|                             | Ir | 78830 | 3                    | Urinary incontinence, unspecified                                                                                              | 6917  | 4751  | 3458.5  | 1.37 | 494.95  | 0.0001 |
|                             | Ir | 78831 | 3                    | Urge incontinence                                                                                                              | 6919  | 4608  | 3459.5  | 1.33 | 388.62  | 0.0001 |
|                             | Ir | 78833 | 3                    | Mixed incontinence (male)(female)                                                                                              | 737   | 513   | 368.5   | 1.39 | 58.21   | 0.0001 |
|                             | Ir | 78836 | 3                    | Nocturnal enuresis                                                                                                             | 358   | 241   | 179     | 1.35 | 21.93   | 0.0001 |
|                             | Ir | 78841 | 3                    | Urinary frequency                                                                                                              | 36766 | 24810 | 18383   | 1.35 | 2295.16 | 0.0001 |
|                             | Ir | 78843 | 3                    | Nocturia                                                                                                                       | 5199  | 2928  | 2599.5  | 1.13 | 41.62   | 0.0001 |
|                             | Ir | 78861 | 3                    | Splitting of urinary stream                                                                                                    | 322   | 269   | 161     | 1.67 | 79.19   | 0.0001 |
|                             | Ir | 78869 | 3                    | Other abnormality of urination                                                                                                 | 573   | 351   | 286.5   | 1.23 | 14.65   | 0.0003 |
|                             | Ir | V536  | 2                    | Fitting and adjustment of urinary devices                                                                                      | 482   | 398   | 241     | 1.65 | 111.12  | 0.0001 |
|                             | Ir | V556  | 2                    | Attention to other artificial opening of urinary tract                                                                         | 113   | 89    | 56.5    | 1.58 | 19.89   | 0.0001 |
| Pregnancy and<br>childbirth | CH | V723  | 2                    | Gynaecological examination                                                                                                     | 3162  | 2043  | 1581    | 1.29 | 137.00  | 0.0001 |
|                             | CH | 634   | 1                    | Abortion                                                                                                                       | 1390  | 794   | 695     | 1.14 | 14.15   | 0.0006 |
|                             | CH | 640   | 1                    | Haemorrhage in early pregnancy                                                                                                 | 7891  | 4706  | 3945.5  | 1.19 | 147.51  | 0.0001 |
|                             | CH | 641   | 1                    | Antepartum haemorrhage, abruptio<br>placentae, and placenta previa                                                             | 736   | 488   | 368     | 1.33 | 39.86   | 0.0001 |
|                             | CH | 643   | 1                    | Excessive vomiting in pregnancy                                                                                                | 4632  | 2724  | 2316    | 1.18 | 72.25   | 0.0001 |
|                             | CH | 644   | 1                    | Early or threatened labour                                                                                                     | 1518  | 1082  | 759     | 1.43 | 141.94  | 0.0001 |
|                             | CH | 646   | 1                    | Other complications of pregnancy, not<br>elsewhere classified                                                                  | 1233  | 855   | 616.5   | 1.39 | 94.72   | 0.0001 |
|                             | CH | 648   | 1                    | Other current conditions in the mother<br>classifiable elsewhere, but complicating<br>pregnancy, childbirth, or the puerperium | 754   | 560   | 377     | 1.49 | 92.70   | 0.0001 |
|                             | CH | 650   | 1                    | Normal delivery                                                                                                                | 958   | 657   | 479     | 1.37 | 67.76   | 0.0001 |
|                             | CH | 651   | 1                    | Multiple gestation                                                                                                             | 197   | 169   | 98.5    | 1.72 | 56.01   | 0.0001 |
|                             | CH | 652   | 1                    | Malposition and malpresentation of foetus                                                                                      | 445   | 343   | 222.5   | 1.54 | 68.90   | 0.0001 |
|                             | CH | 654   | 1                    | Abnormality of organs and soft tissues of<br>pelvis                                                                            | 422   | 295   | 211     | 1.4  | 34.39   | 0.0001 |
|                             | CH | 655   | 1                    | Known or suspected foetal abnormality<br>affecting management of mother                                                        | 240   | 210   | 120     | 1.75 | 75.93   | 0.0001 |
|                             | CH | 656   | 1                    | Other foetal and placental problems<br>affecting management of mother                                                          | 302   | 215   | 151     | 1.42 | 28.00   | 0.0001 |
|                             | CH | 658   | 1                    | Other problems associated with amniotic<br>cavity and membranes                                                                | 201   | 132   | 100.5   | 1.31 | 10.04   | 0.0264 |



|    |      |   |                                                                                                                              |      |      |        |      |        |        |
|----|------|---|------------------------------------------------------------------------------------------------------------------------------|------|------|--------|------|--------|--------|
| CH | 661  | 1 | Abnormality of forces of labour                                                                                              | 152  | 128  | 76     | 1.68 | 39.06  | 0.0001 |
| CH | 662  | 1 | Long labour                                                                                                                  | 127  | 97   | 63.5   | 1.53 | 18.60  | 0.0001 |
| CH | 664  | 1 | Trauma to perineum and vulva during delivery                                                                                 | 96   | 70   | 48     | 1.46 | 10.47  | 0.0161 |
| CH | 669  | 1 | Other complications of labour and delivery, not elsewhere classified                                                         | 191  | 131  | 95.5   | 1.37 | 13.52  | 0.0009 |
| CH | 765  | 1 | Disorders relating to short gestation and unspecified low birthweight                                                        | 117  | 84   | 58.5   | 1.44 | 11.50  | 0.0055 |
| CH | 770  | 1 | Other respiratory conditions of foetus and new-born                                                                          | 134  | 106  | 67     | 1.58 | 24.20  | 0.0001 |
| CH | 6349 | 2 | Abortion, without mention of complication                                                                                    | 756  | 454  | 378    | 1.2  | 15.39  | 0.0003 |
| CH | 6400 | 2 | Threatened abortion                                                                                                          | 6475 | 3902 | 3237.5 | 1.21 | 137.36 | 0.0001 |
| CH | 6410 | 2 | Placenta previa without haemorrhage                                                                                          | 63   | 53   | 31.5   | 1.68 | 16.10  | 0.0003 |
| CH | 6411 | 2 | Haemorrhage from placenta previa                                                                                             | 92   | 69   | 46     | 1.5  | 12.03  | 0.0035 |
| CH | 6419 | 2 | Unspecified antepartum haemorrhage                                                                                           | 428  | 274  | 214    | 1.28 | 17.05  | 0.0001 |
| CH | 6430 | 2 | Mild hyperemesis gravidarum                                                                                                  | 1900 | 1116 | 950    | 1.17 | 29.16  | 0.0001 |
| CH | 6431 | 2 | Hyperemesis gravidarum with metabolic disturbance                                                                            | 2079 | 1219 | 1039.5 | 1.17 | 31.15  | 0.0001 |
| CH | 6439 | 2 | Unspecified vomiting of pregnancy                                                                                            | 610  | 366  | 305    | 1.2  | 12.28  | 0.0031 |
| CH | 6440 | 2 | Threatened premature labour                                                                                                  | 1169 | 818  | 584.5  | 1.4  | 95.93  | 0.0001 |
| CH | 6441 | 2 | Other threatened labour                                                                                                      | 152  | 120  | 76     | 1.58 | 27.13  | 0.0001 |
| CH | 6442 | 2 | Early onset of delivery                                                                                                      | 177  | 129  | 88.5   | 1.46 | 19.24  | 0.0001 |
| CH | 6468 | 2 | Other specified complications of pregnancy                                                                                   | 404  | 299  | 202    | 1.48 | 48.56  | 0.0001 |
| CH | 6469 | 2 | Unspecified complication of pregnancy                                                                                        | 558  | 418  | 279    | 1.5  | 72.45  | 0.0001 |
| CH | 6480 | 2 | Diabetes mellitus conditions in the mother classifiable elsewhere, but complicating pregnancy, childbirth, or the puerperium | 74   | 59   | 37     | 1.59 | 13.99  | 0.0006 |
| CH | 6482 | 2 | Anaemia conditions in the mother classifiable elsewhere, but complicating pregnancy, childbirth, or the puerperium           | 222  | 151  | 111    | 1.36 | 14.74  | 0.0003 |
| CH | 6489 | 2 | Other current conditions classifiable elsewhere, but complicating pregnancy, childbirth, or the puerperium                   | 385  | 297  | 192.5  | 1.54 | 59.91  | 0.0001 |
| CH | 6510 | 2 | Twin pregnancy                                                                                                               | 176  | 148  | 88     | 1.68 | 44.88  | 0.0001 |
| CH | 6522 | 2 | Breech presentation without mention of version                                                                               | 355  | 284  | 177.5  | 1.6  | 68.42  | 0.0001 |
| CH | 6542 | 2 | Previous caesarean delivery NOS                                                                                              | 326  | 238  | 163    | 1.46 | 35.84  | 0.0001 |
| CH | 6558 | 2 | Other known or suspected foetal abnormality, not elsewhere classified, affecting management of mother                        | 169  | 157  | 84.5   | 1.86 | 73.84  | 0.0001 |
| CH | 6563 | 2 | Foetal distress affecting management of mother                                                                               | 105  | 82   | 52.5   | 1.56 | 17.58  | 0.0001 |
| CH | 6612 | 2 | Other and unspecified uterine inertia                                                                                        | 113  | 106  | 56.5   | 1.88 | 52.08  | 0.0001 |

|    |       |   |                                                                                                        |      |      |       |      |       |        |
|----|-------|---|--------------------------------------------------------------------------------------------------------|------|------|-------|------|-------|--------|
| CH | 6620  | 2 | Prolonged first stage                                                                                  | 73   | 56   | 36.5  | 1.53 | 10.98 | 0.0108 |
| CH | 6641  | 2 | Second-degree perineal laceration                                                                      | 65   | 50   | 32.5  | 1.54 | 9.94  | 0.0286 |
| CH | 6670  | 2 | Retained placenta without haemorrhage                                                                  | 17   | 17   | 8.5   | 2    | 11.78 | 0.0047 |
| CH | 6748  | 2 | Other complications of the puerperium, not elsewhere classified                                        | 249  | 189  | 124.5 | 1.52 | 35.10 | 0.0001 |
| CH | 7651  | 2 | Other preterm immaturity                                                                               | 114  | 81   | 57    | 1.42 | 10.43 | 0.0173 |
| CH | 7706  | 2 | Transitory tachypnoea of new-born                                                                      | 47   | 39   | 23.5  | 1.66 | 11.14 | 0.008  |
| CH | 7708  | 2 | Other respiratory problem after birth                                                                  | 65   | 51   | 32.5  | 1.57 | 11.19 | 0.0071 |
| CH | 63401 | 3 | Abortion, complicated by genital tract and pelvic infection, incomplete                                | 133  | 92   | 66.5  | 1.38 | 10.03 | 0.0266 |
| CH | 63491 | 3 | Abortion, without mention of complication, incomplete                                                  | 315  | 197  | 157.5 | 1.25 | 10.01 | 0.0269 |
| CH | 64000 | 3 | Threatened abortion, unspecified as to episode of care or not applicable                               | 2266 | 1344 | 1133  | 1.19 | 39.53 | 0.0001 |
| CH | 64001 | 3 | Threatened abortion, delivered, with or without mention of antepartum condition                        | 215  | 165  | 107.5 | 1.53 | 32.42 | 0.0001 |
| CH | 64003 | 3 | Threatened abortion, antepartum condition or complication                                              | 3868 | 2321 | 1934  | 1.2  | 77.97 | 0.0001 |
| CH | 64090 | 3 | Unspecified haemorrhage in early pregnancy, unspecified as to episode of care or not applicable        | 688  | 406  | 344   | 1.18 | 11.24 | 0.0065 |
| CH | 64101 | 3 | Placenta previa without haemorrhage, delivered, with or without mention of antepartum condition        | 46   | 41   | 23    | 1.78 | 16.07 | 0.0003 |
| CH | 64193 | 3 | Unspecified antepartum haemorrhage, antepartum condition or complication                               | 329  | 209  | 164.5 | 1.27 | 12.19 | 0.0033 |
| CH | 64300 | 3 | Mild hyperemesis gravidarum, unspecified as to episode of care or not applicable                       | 1291 | 773  | 645.5 | 1.2  | 25.35 | 0.0001 |
| CH | 64310 | 3 | Hyperemesis gravidarum with metabolic disturbance, unspecified as to episode of care or not applicable | 254  | 162  | 127   | 1.28 | 9.77  | 0.0343 |
| CH | 64313 | 3 | Hyperemesis gravidarum with metabolic disturbance, antepartum condition or complication                | 1802 | 1041 | 901   | 1.16 | 21.84 | 0.0001 |
| CH | 64393 | 3 | Unspecified vomiting of pregnancy, antepartum condition or complication                                | 248  | 162  | 124   | 1.31 | 11.83 | 0.0041 |
| CH | 64400 | 3 | Threatened premature labour, unspecified as to episode of care or not applicable                       | 356  | 268  | 178   | 1.51 | 47.68 | 0.0001 |
| CH | 64403 | 3 | Threatened premature labour, antepartum condition or complication                                      | 813  | 550  | 406.5 | 1.35 | 51.77 | 0.0001 |
| CH | 64410 | 3 | Other threatened labour, unspecified as to episode of care or not applicable                           | 68   | 58   | 34    | 1.71 | 18.74 | 0.0001 |
| CH | 64413 | 3 | Other threatened labour, antepartum                                                                    | 84   | 62   | 42    | 1.48 | 9.92  | 0.029  |

|    |       |   |                                                                                                                                                                   |     |     |       |      |       |        |  |
|----|-------|---|-------------------------------------------------------------------------------------------------------------------------------------------------------------------|-----|-----|-------|------|-------|--------|--|
|    |       |   | condition or complication                                                                                                                                         |     |     |       |      |       |        |  |
| CH | 64421 | 3 | Early onset of delivery, delivered, with or without mention of antepartum condition                                                                               | 168 | 124 | 84    | 1.48 | 19.84 | 0.0001 |  |
| CH | 64680 | 3 | Other specified complications of pregnancy, unspecified as to episode of care or not applicable                                                                   | 213 | 179 | 106.5 | 1.68 | 54.12 | 0.0001 |  |
| CH | 64690 | 3 | Unspecified complication of pregnancy, unspecified as to episode of care or not applicable                                                                        | 408 | 314 | 204   | 1.54 | 62.59 | 0.0001 |  |
| CH | 64893 | 3 | Other current conditions classifiable elsewhere in the mother, but complicating pregnancy, childbirth, or the puerperium, antepartum condition or complication    | 269 | 217 | 134.5 | 1.61 | 54.38 | 0.0001 |  |
| CH | 65100 | 3 | Twin pregnancy, unspecified as to episode of care or not applicable                                                                                               | 50  | 41  | 25    | 1.64 | 11.09 | 0.01   |  |
| CH | 65101 | 3 | Twin pregnancy, delivered, with or without mention of antepartum condition                                                                                        | 75  | 63  | 37.5  | 1.68 | 19.01 | 0.0001 |  |
| CH | 65103 | 3 | Twin pregnancy, antepartum condition or complication                                                                                                              | 51  | 44  | 25.5  | 1.73 | 14.95 | 0.0003 |  |
| CH | 65221 | 3 | Breech presentation without mention of version, delivered, with or without mention of antepartum condition                                                        | 300 | 249 | 150   | 1.66 | 71.18 | 0.0001 |  |
| CH | 65421 | 3 | Previous caesarean delivery NOS, delivered with or without mention of antepartum condition                                                                        | 298 | 221 | 149   | 1.48 | 36.29 | 0.0001 |  |
| CH | 65581 | 3 | Other known or suspected foetal abnormality, not elsewhere classified, affecting management of mother, delivered, with or without mention of antepartum condition | 162 | 150 | 81    | 1.85 | 69.51 | 0.0001 |  |
| CH | 65630 | 3 | Foetal distress affecting management of mother, unspecified as to episode of care or not applicable                                                               | 36  | 31  | 18    | 1.72 | 10.45 | 0.0168 |  |
| CH | 66120 | 3 | Other and unspecified uterine inertia, unspecified as to episode of care or not applicable                                                                        | 110 | 103 | 55    | 1.87 | 50.19 | 0.0001 |  |
| CH | 66201 | 3 | Prolonged first stage, delivered, with or without mention of antepartum condition                                                                                 | 73  | 56  | 36.5  | 1.53 | 10.98 | 0.0108 |  |
| CH | 66411 | 3 | Second-degree perineal laceration, delivered, with or without mention of antepartum condition                                                                     | 65  | 50  | 32.5  | 1.54 | 9.94  | 0.0286 |  |
| CH | 66700 | 3 | Retained placenta without haemorrhage, unspecified as to episode of care or not                                                                                   | 17  | 17  | 8.5   | 2    | 11.78 | 0.0047 |  |

|                        |              |       |       |                                                                                                                                    |                                          |       |         |        |        |        |
|------------------------|--------------|-------|-------|------------------------------------------------------------------------------------------------------------------------------------|------------------------------------------|-------|---------|--------|--------|--------|
|                        | CH           | 67480 | 3     | applicable<br>Other complications of the puerperium, not elsewhere classified, unspecified as to episode of care or not applicable | 249                                      | 189   | 124.5   | 1.52   | 35.10  | 0.0001 |
|                        | CH           | V22   | 1     | Normal pregnancy                                                                                                                   | 2859                                     | 1826  | 1429.5  | 1.28   | 111.43 | 0.0001 |
|                        | CH           | V221  | 2     | Supervision of other normal pregnancy                                                                                              | 2040                                     | 1353  | 1020    | 1.33   | 110.73 | 0.0001 |
|                        | CH           | V24   | 1     | Postpartum care and examination                                                                                                    | 642                                      | 397   | 321     | 1.24   | 18.17  | 0.0001 |
|                        | CH           | V242  | 2     | Care and examination of routine postpartum follow-up                                                                               | 488                                      | 306   | 244     | 1.25   | 15.93  | 0.0003 |
|                        | CH           | V27   | 1     | Outcome of delivery                                                                                                                | 1090                                     | 818   | 545     | 1.5    | 143.14 | 0.0001 |
|                        | CH           | V270  | 2     | Outcome of delivery single liveborn                                                                                                | 1022                                     | 762   | 511     | 1.49   | 128.80 | 0.0001 |
|                        | CH           | V272  | 2     | Outcome of delivery twins, both liveborn                                                                                           | 46                                       | 38    | 23      | 1.65   | 10.63  | 0.0139 |
|                        | CH           | V30   | 1     | Single liveborn                                                                                                                    | 123                                      | 89    | 61.5    | 1.45   | 12.74  | 0.0019 |
|                        | CH           | V300  | 2     | Single liveborn, born in hospital                                                                                                  | 123                                      | 89    | 61.5    | 1.45   | 12.74  | 0.0019 |
|                        | CH           | V31   | 1     | Twin, mate liveborn                                                                                                                | 31                                       | 27    | 15.5    | 1.74   | 9.57   | 0.0466 |
|                        | CH           | V310  | 2     | Twin, mate liveborn, born in hospital                                                                                              | 31                                       | 27    | 15.5    | 1.74   | 9.57   | 0.0466 |
|                        | CH           | V724  | 2     | Pregnancy examination or test, pregnancy unconfirmed                                                                               | 2740                                     | 1548  | 1370    | 1.13   | 23.19  | 0.0001 |
| Musculoskeletal System | CH           | 721   | 1     | Spondylosis and allied disorders                                                                                                   | 28326                                    | 14745 | 14163   | 1.04   | 23.92  | 0.0001 |
|                        | ADRr         | 723   | 1     | Other disorders of cervical region                                                                                                 | 11131                                    | 5963  | 5565.5  | 1.07   | 28.41  | 0.0001 |
|                        | ADRr         | 724   | 1     | Other and unspecified disorders of back                                                                                            | 70533                                    | 38071 | 35266.5 | 1.08   | 223.26 | 0.0001 |
|                        | ADRr         | 847   | 1     | Sprains and strains of other and unspecified parts of back                                                                         | 17733                                    | 9435  | 8866.5  | 1.06   | 36.48  | 0.0001 |
|                        | ADRr         | 7170  | 2     | Old bucket handle tear of medial meniscus                                                                                          | 210                                      | 165   | 105     | 1.57   | 36.45  | 0.0001 |
|                        | ADR          | 7180  | 2     | Articular cartilage disorder                                                                                                       | 472                                      | 310   | 236     | 1.31   | 23.60  | 0.0001 |
|                        | ADRr         | 7201  | 2     | Spinal enthesopathy                                                                                                                | 572                                      | 342   | 286     | 1.2    | 11.04  | 0.0102 |
|                        | ADRr         | 7210  | 2     | Cervical spondylosis without myelopathy                                                                                            | 6446                                     | 3399  | 3223    | 1.05   | 9.62   | 0.0446 |
|                        | ADRr         | 7231  | 2     | Cervicalgia                                                                                                                        | 5883                                     | 3160  | 2941.5  | 1.07   | 16.25  | 0.0003 |
|                        | ADR          | 7242  | 2     | Lumbago                                                                                                                            | 31911                                    | 17786 | 15955.5 | 1.11   | 210.47 | 0.0001 |
|                        | ADRr         | 7243  | 2     | Sciatica                                                                                                                           | 10319                                    | 5449  | 5159.5  | 1.06   | 16.25  | 0.0003 |
|                        | ADR          | 7245  | 2     | Backache, unspecified                                                                                                              | 20573                                    | 10826 | 10286.5 | 1.05   | 28.31  | 0.0001 |
|                        | ADR          | 7270  | 2     | Synovitis and tenosynovitis                                                                                                        | 23713                                    | 12231 | 11856.5 | 1.03   | 11.83  | 0.0041 |
|                        | ADRr         | 8470  | 2     | Sprains and strains of neck                                                                                                        | 6080                                     | 3279  | 3040    | 1.08   | 18.81  | 0.0001 |
|                        | ADRr         | 8472  | 2     | Sprains and strains of lumbar                                                                                                      | 8401                                     | 4417  | 4200.5  | 1.05   | 11.16  | 0.0079 |
|                        | ADRr         | 71619 | 3     | Traumatic arthropathy, multiple sites                                                                                              | 132                                      | 121   | 66      | 1.83   | 53.63  | 0.0001 |
|                        | ADR          | 71800 | 3     | Articular cartilage disorder, unspecified site                                                                                     | 324                                      | 228   | 162     | 1.41   | 27.69  | 0.0001 |
|                        | ADR          | 71945 | 3     | Pain in joint, pelvic region and thigh                                                                                             | 1188                                     | 712   | 594     | 1.2    | 23.60  | 0.0001 |
|                        | ADRr         | 71960 | 3     | Other symptoms referable to joint, unspecified site                                                                                | 623                                      | 366   | 311.5   | 1.17   | 9.58   | 0.0455 |
|                        | Examinations | ADR   | 72700 | 3                                                                                                                                  | Synovitis and tenosynovitis, unspecified | 15651 | 8164    | 7825.5 | 1.04   | 14.65  |
| CH                     |              | V148  | 2     | Personal history of allergy to other specified medicinal agents                                                                    | 86                                       | 65    | 43      | 1.51   | 11.81  | 0.0042 |
| CH                     |              | V53   | 1     | Fitting and adjustment of other device                                                                                             | 555                                      | 425   | 277.5   | 1.53   | 82.59  | 0.0001 |

|        |      |       |   |                                                                  |       |      |        |      |        |        |
|--------|------|-------|---|------------------------------------------------------------------|-------|------|--------|------|--------|--------|
| Others | CH   | V584  | 2 | Encounter for other aftercare following surgery                  | 1442  | 985  | 721    | 1.37 | 98.95  | 0.0001 |
|        | CH   | V5841 | 3 | Encounter for planned postoperative wound closure                | 391   | 261  | 195.5  | 1.34 | 22.38  | 0.0001 |
|        | CH   | V5849 | 3 | Other specified aftercare following surgery                      | 1051  | 724  | 525.5  | 1.38 | 76.87  | 0.0001 |
|        | CH   | V65   | 1 | Other persons seeking consultation without complaint or sickness | 1906  | 1077 | 953    | 1.13 | 16.18  | 0.0003 |
|        | CH   | V654  | 2 | Other counselling, not elsewhere classified                      | 1742  | 1025 | 871    | 1.18 | 27.37  | 0.0001 |
|        | CH   | V6540 | 3 | Counselling, not otherwise specified                             | 1389  | 855  | 694.5  | 1.23 | 37.43  | 0.0001 |
|        | CH   | V72   | 1 | Special investigations and examinations                          | 7122  | 4252 | 3561   | 1.19 | 134.94 | 0.0001 |
|        | CH   | 922   | 1 | Contusion of trunk                                               | 16986 | 8806 | 8493   | 1.04 | 11.54  | 0.0055 |
|        | CH   | 999   | 2 | Complications of medical care, not elsewhere classified          | 255   | 164  | 127.5  | 1.29 | 10.60  | 0.0141 |
|        | CH   | 2709  | 2 | Unspecified disorder of amino-acid metabolism                    | 49    | 41   | 24.5   | 1.67 | 12.16  | 0.0033 |
|        | CH   | 2739  | 2 | Unspecified disorder of plasma protein metabolism                | 72    | 57   | 36     | 1.58 | 13.06  | 0.0014 |
|        | CH   | 2779  | 2 | Unspecified disorder of metabolism                               | 648   | 398  | 324    | 1.23 | 17.05  | 0.0001 |
|        | CH   | 4556  | 2 | Unspecified haemorrhoids without mention of complication         | 9103  | 4800 | 4551.5 | 1.05 | 13.57  | 0.0009 |
|        | CH   | 4564  | 2 | Scrotal varices                                                  | 637   | 393  | 318.5  | 1.23 | 17.59  | 0.0001 |
|        | ADR  | 7820  | 2 | Disturbance of skin sensation                                    | 535   | 318  | 267.5  | 1.19 | 9.59   | 0.0454 |
|        | ADRr | 7842  | 2 | Swelling, mass, or lump in head and neck                         | 1982  | 1118 | 991    | 1.13 | 16.32  | 0.0003 |
|        | ADR  | 7847  | 2 | Epistaxis                                                        | 7627  | 4063 | 3813.5 | 1.07 | 16.34  | 0.0003 |
|        | Ir   | 7864  | 2 | Abnormal sputum                                                  | 2635  | 1504 | 1317.5 | 1.14 | 26.49  | 0.0001 |
|        | Ir   | 8732  | 2 | Other open wound of nose, without mention of complication        | 282   | 206  | 141    | 1.46 | 31.13  | 0.0001 |
|        | ADR  | 78071 | 3 | Chronic fatigue syndrome                                         | 2154  | 1254 | 1077   | 1.16 | 29.22  | 0.0001 |
|        | Ir   | 87322 | 3 | Open wound of nasal cavity, without mention of complication      | 117   | 107  | 58.5   | 1.83 | 46.94  | 0.0001 |

\*Clinical classification was expressed in either disease or medication system.

†Node was expressed in ICD9 diagnostic codes.

Abbreviation: ADR=known adverse drug reaction; ADRr=events related to known adverse drug reaction; CH=cohort-related; I=indication; Ir=indication-related; LLR=log likelihood ratio; PT=protopathic bias; RR=relative risk.

Supplementary Table 4. Risk profile of SGLT2 inhibitors

| SOC, safety concern                                         | Preferred Terms                                                                                                                                                 | PBRER                      | Dapagliflozin                          |                                            | Empagliflozin              |                              |                                           |
|-------------------------------------------------------------|-----------------------------------------------------------------------------------------------------------------------------------------------------------------|----------------------------|----------------------------------------|--------------------------------------------|----------------------------|------------------------------|-------------------------------------------|
|                                                             |                                                                                                                                                                 |                            | Warnings and precautions               | Adverse reactions                          | PBRER                      | Warnings and precautions     | Adverse reactions                         |
| <b>Gastrointestinal disorders</b>                           |                                                                                                                                                                 |                            |                                        |                                            |                            |                              |                                           |
| <i>EU RMP-Important potential risks</i>                     | Pancreatitis (Empagliflozin)                                                                                                                                    |                            |                                        |                                            |                            |                              |                                           |
|                                                             | Dry mouth                                                                                                                                                       |                            |                                        | EMA-uncommon                               |                            |                              |                                           |
|                                                             | Constipation                                                                                                                                                    |                            |                                        | EMA-uncommon<br>USFDA-CT<br>TFDA-CT        |                            |                              |                                           |
|                                                             | Nausea                                                                                                                                                          |                            | EMA-DKA symptoms                       | USFDA-CT<br>TFDA-CT                        |                            | EMA-DKA symptoms             | USFDA-CT<br>TFDA-CT                       |
|                                                             | Vomiting                                                                                                                                                        |                            | EMA-DKA symptoms<br>USFDA-DKA symptoms |                                            |                            | EMA-DKA symptoms             |                                           |
|                                                             | Abdominal pain                                                                                                                                                  |                            | EMA-DKA symptoms<br>USFDA-DKA symptoms |                                            |                            | EMA-DKA symptoms             |                                           |
| <b>General disorders and administration site conditions</b> |                                                                                                                                                                 |                            |                                        |                                            |                            |                              |                                           |
|                                                             | Thirst                                                                                                                                                          |                            | EMA-DKA symptoms                       | EMA-uncommon                               |                            |                              | CCDS<br>EMA-common<br>USFDA-CT<br>TFDA-CT |
| <b>Hepatobiliary disorders</b>                              |                                                                                                                                                                 |                            |                                        |                                            |                            |                              |                                           |
| <i>EU RMP-Important potential risks</i>                     | Liver injury                                                                                                                                                    | Important potential risks  | EMA                                    |                                            | Important potential risks  | EMA                          |                                           |
| <b>Immune system disorders</b>                              |                                                                                                                                                                 |                            |                                        |                                            |                            |                              |                                           |
|                                                             | Hypersensitivity reactions                                                                                                                                      | Important potential risks  |                                        | USFDA-CT<br>TFDA-CT                        |                            | USFDA<br>TFDA                | USFDA<br>TFDA                             |
| <b>Infections and infestations</b>                          |                                                                                                                                                                 |                            |                                        |                                            |                            |                              |                                           |
|                                                             | Urinary tract infection (including pyelonephritis, urosepsis, genitourinary tract infection, cystitis, pyelonephritis, trigonitis, urethritis and prostatitis.) | Important identified risks | EMA<br>USFDA<br>TFDA                   | CCDS-common<br>EMA-common<br>USFDA<br>TFDA | Important identified risks | CCDS<br>EMA<br>USFDA<br>TFDA | CCDS<br>EMA-common<br>USFDA<br>TFDA       |

|                                                       |                                                                                                                                                                                                                                  |                           |                |                                     |                            |                     |                                    |
|-------------------------------------------------------|----------------------------------------------------------------------------------------------------------------------------------------------------------------------------------------------------------------------------------|---------------------------|----------------|-------------------------------------|----------------------------|---------------------|------------------------------------|
|                                                       | <b>Genital infection (Vaginal moniliasis, vulvovaginitis, balanitis, vulvovaginal infections and candidiasis, balanoposthitis, balanitis candida, penile abscess, penile infection, vulval abscess and vaginitis bacterial.)</b> |                           | USFDA TFDA     | CCDS-common EMA-common USFDA TFDA A | Important identified risks | USFDA TFDA          | CCDSEMA-common USFDA TFDA          |
|                                                       | <b>Upper respiratory tract infection</b>                                                                                                                                                                                         |                           |                |                                     |                            |                     | USFDA-CT TFDA-CT                   |
|                                                       | <b>Necrotizing fasciitis (Fournier's gangrene)</b>                                                                                                                                                                               |                           | EMA TFDA       | EMA-very rare USFDA-PMS TFDA        |                            | CCDS EMA USFDA TFDA | CCDS EMA-unknown USFDA TFDA        |
|                                                       | <b>Nasopharyngitis</b>                                                                                                                                                                                                           |                           |                | USFDA-CT TFDA-CT                    |                            |                     |                                    |
|                                                       | <b>Influenza</b>                                                                                                                                                                                                                 |                           |                | USFDA-CT TFDA-CT                    |                            |                     |                                    |
| <b>Injury, poisoning and procedural complications</b> |                                                                                                                                                                                                                                  |                           |                |                                     |                            |                     |                                    |
|                                                       | <b>Bone fracture (Empagliflozin-EU-RMP only · Dapagliflozin)</b>                                                                                                                                                                 | Important potential risks |                |                                     | Important potential risks  |                     |                                    |
| <b>Investigations</b>                                 |                                                                                                                                                                                                                                  |                           |                |                                     |                            |                     |                                    |
|                                                       | <b>Clinical consequences of increased haematocrit (Dapagliflozin)</b>                                                                                                                                                            | Important potential risks |                | EMA-common USFDA-CT TFDA-CT         |                            | EMA                 | CCDS EMA-uncommon USFDA-CT TFDA-CT |
|                                                       | <b>Increases in Serum Creatinine</b>                                                                                                                                                                                             |                           |                | EMA-common USFDA-CT TFDA-CT         |                            |                     | CCDS EMA-uncommon                  |
|                                                       | <b>Decreases in EGFR</b>                                                                                                                                                                                                         |                           |                | EMA-common USFDA-CT TFDA-CT         |                            |                     | CCDS EMA-uncommon                  |
|                                                       | <b>Decrease in Serum Bicarbonate</b>                                                                                                                                                                                             |                           |                | USFDA-CT TFDA-CT                    |                            |                     |                                    |
|                                                       | <b>Serum lipids increased (total cholesterol · HDL-cholesterol · LDL-cholesterol)</b>                                                                                                                                            |                           |                | EMA-common USFDA-CT TFDA-CT         |                            | USFDA               | CCDS EMA-common USFDA TFDA         |
|                                                       | <b>Blood urea increased</b>                                                                                                                                                                                                      |                           |                | EMA-uncommon                        |                            |                     |                                    |
|                                                       | <b>Weight decreased</b>                                                                                                                                                                                                          |                           |                | EMA-uncommon                        |                            |                     |                                    |
|                                                       | <b>Glucose urine present</b>                                                                                                                                                                                                     |                           | EMA            | TFDA-interaction                    |                            |                     |                                    |
| <b>Metabolism and nutrition disorders</b>             |                                                                                                                                                                                                                                  |                           |                |                                     |                            |                     |                                    |
|                                                       | <b>Diabetic ketoacidosis (Signs and symptoms at presentation were consistent with dehydration and</b>                                                                                                                            | Important potential risks | EMA USFDA TFDA | CCDS-rare EMA-rare USFDA TFDA       | Important                  | CCDSEMA USFDA TFDA  | CCDSEMA-rare USFDA TFDA            |

|                                                                            |                                                                                                                                                                                                          |                           |                                          |                                                  |                            |               |                                             |
|----------------------------------------------------------------------------|----------------------------------------------------------------------------------------------------------------------------------------------------------------------------------------------------------|---------------------------|------------------------------------------|--------------------------------------------------|----------------------------|---------------|---------------------------------------------|
|                                                                            | severe metabolic acidosis and included nausea, vomiting, abdominal pain, generalized malaise, and shortness of breath)                                                                                   |                           |                                          |                                                  | identified risks           |               |                                             |
|                                                                            | Volume depletion (including the predefined terms blood pressure (ambulatory) decreased, blood pressure systolic decreased, dehydration, hypotension, hypovolaemia, orthostatic hypotension, and syncope) | Important potential risks | CCDS<br>EMA<br>USFDA                     | EMA-uncommon<br>USFDA<br>TFDA-CT                 | Important identified risks | CCDS<br>EMA   | CCDS<br>EMA-uncommon<br>USFDA-CT<br>TFDA-CT |
|                                                                            | Hypoglycaemia (with insulin and/or SU)                                                                                                                                                                   |                           | CCDS<br>EMA-Interaction<br>USFDA<br>TFDA | EMA-very common<br>USFDA<br>TFDA                 | Important identified risks | USFDA<br>TFDA | CCDS<br>EMA-very common<br>USFDA<br>TFDA    |
|                                                                            | Dyslipidaemia                                                                                                                                                                                            |                           |                                          | EMA-common<br>USFDA-CT<br>TFDA-CT                |                            |               |                                             |
| <b>Musculoskeletal and connective tissue disorders</b>                     |                                                                                                                                                                                                          |                           |                                          |                                                  |                            |               |                                             |
|                                                                            | Back pain                                                                                                                                                                                                |                           |                                          | CCDS-common<br>EMA-common<br>USFDA-CT<br>TFDA-CT |                            |               |                                             |
|                                                                            | Arthralgia                                                                                                                                                                                               |                           |                                          |                                                  |                            |               | USFDA-CT<br>TFDA-CT                         |
|                                                                            | Pain in extremity                                                                                                                                                                                        |                           |                                          | USFDA-CT<br>TFDA-CT                              |                            |               |                                             |
| <b>Neoplasms benign, malignant and unspecified (incl cysts and polyps)</b> |                                                                                                                                                                                                          |                           |                                          |                                                  |                            |               |                                             |
| <b>EU RMP-<br/>Important<br/>potential risks</b>                           | Bladder cancer (Dapagliflozin)                                                                                                                                                                           | Important potential risks |                                          |                                                  |                            |               |                                             |
|                                                                            | Urinary tract carcinogenicity (Bladder cancer, renal cancer) (Empagliflozin)                                                                                                                             |                           |                                          |                                                  | Important potential risks  |               |                                             |
|                                                                            | Breast cancer (Dapagliflozin)                                                                                                                                                                            | Important potential risks |                                          |                                                  |                            |               |                                             |
|                                                                            | Prostate cancer (Dapagliflozin)                                                                                                                                                                          |                           |                                          |                                                  |                            |               |                                             |
| <b>Nervous system disorders</b>                                            |                                                                                                                                                                                                          |                           |                                          |                                                  |                            |               |                                             |
|                                                                            | dizziness                                                                                                                                                                                                |                           |                                          | EMA-common                                       |                            |               |                                             |
| <b>Renal and urinary disorders</b>                                         |                                                                                                                                                                                                          |                           |                                          |                                                  |                            |               |                                             |



|                                                        |                                        |                           |                                              |                                                     |                                 |                      |                                              |
|--------------------------------------------------------|----------------------------------------|---------------------------|----------------------------------------------|-----------------------------------------------------|---------------------------------|----------------------|----------------------------------------------|
|                                                        | <b>Renal impairment/renal failure</b>  | Important potential risks | EMA                                          | EMA-common                                          |                                 | CCDSEMAUSFDA<br>TFDA | USFDATFDA                                    |
|                                                        | <b>Pollakiuria</b>                     |                           |                                              | CCDS-common<br>EMA-common<br>USFDA-CT               |                                 |                      | CCDS<br>EMA-common<br>USFDA-CT<br>TFDA-CT    |
|                                                        | <b>Polyuria</b>                        |                           |                                              | CCDS-common<br>EMA-common<br>USFDA-CT<br>TFDA-CT    |                                 |                      | CCDS<br>EMA-common<br>USFDA-CT<br>TFDA-CT    |
|                                                        | <b>Dysuria</b>                         |                           |                                              | EMA-common<br>USFDA-CT<br>TFDA-CT                   |                                 |                      | CCDS<br>EMA-uncommon                         |
|                                                        | <b>Nocturia</b>                        |                           |                                              | EMA-uncommon                                        |                                 |                      | CCDS<br>EMA-common<br>USFDA-CT<br>TFDA-CT    |
|                                                        | <b>Acute Kidney Injury</b>             |                           | TFDA                                         | USFDA-PMS<br>TFDA                                   |                                 | USFDA<br>TFDA        | USFDA<br>TFDA                                |
| <b>Reproductive system and breast disorders</b>        |                                        |                           |                                              |                                                     |                                 |                      |                                              |
|                                                        | <b>Vulvovaginal pruritus</b>           |                           |                                              | EMA-uncommon                                        |                                 |                      |                                              |
|                                                        | <b>Pruritus genital</b>                |                           |                                              | EMA-uncommon                                        |                                 |                      |                                              |
| <b>Respiratory, thoracic and mediastinal disorders</b> |                                        |                           |                                              |                                                     |                                 |                      |                                              |
|                                                        | <b>Shortness of breath</b>             |                           | EMA-DKA<br>symptoms<br>USFDA-DKA<br>symptoms |                                                     |                                 | EMA-DKA<br>symptoms  |                                              |
| <b>Skin and subcutaneous tissue disorders</b>          |                                        |                           |                                              |                                                     |                                 |                      |                                              |
|                                                        | <b>Angioedema</b>                      |                           |                                              | EMA-very rare                                       |                                 | USFDA<br>TFDA        | CCDS<br>EMA-unknown<br>USFDA-PMS<br>TFDA-PMS |
|                                                        | <b>Skin reaction (rash, urticaria)</b> |                           |                                              | CCDS-<br>unknownEMA-<br>commonUSFDA-<br>PMSTFDA-PMS |                                 |                      | CCDSEMA-<br>commonUSFDA-<br>PMSTFDA-PMS      |
| <b>Surgical and medical procedures</b>                 |                                        |                           |                                              |                                                     |                                 |                      |                                              |
| <b>EU RMP-<br/>Important<br/>potential risks</b>       | <b>Lower limb amputation</b>           |                           | EMA<br>USFDA                                 |                                                     | Important<br>potential<br>risks | EMA                  |                                              |
| <b>Vascular disorders</b>                              |                                        |                           |                                              |                                                     |                                 |                      |                                              |
|                                                        | <b>hypotension</b>                     |                           | TFDA<br>EMA                                  | USFDA<br>TFDA                                       |                                 | USFDA<br>TFDA        | USFDA<br>TFDA                                |

Frequencies are defined as very common ( $\geq 1/10$ ), common ( $\geq 1/100$  to  $< 1/10$ ), uncommon ( $\geq 1/1,000$  to  $< 1/100$ ), rare ( $\geq 1/10,000$  to  $< 1/1,000$ ), or very rare ( $< 1/10,000$ ), and not known (cannot be estimated from the available data).

|                      |                             |  |
|----------------------|-----------------------------|--|
| <b>Dapagliflozin</b> | CCDS (2018/12/7)            |  |
|                      | EMA(2020/1/14)              |  |
|                      | USFDA (2020/5)              |  |
|                      | TFDA (2020/3)               |  |
|                      | PBRER (2018/10/5-2019/10/4) |  |
| <b>Empagliflozin</b> | CCDS (2018/9/24)            |  |
|                      | EMA (2020/5/26)             |  |
|                      | USFDA (2020/1)              |  |
|                      | TFDA (USPI 2018/10)         |  |
|                      | PBRER (2018/10/5~2019/10/4) |  |

Supplementary Table 5. Risk profile of FQs and NFQs

|                                             |                                                                 | Non-fluoroquinolone |             |                |      |                |     | Fluoroquinolone |                           |               |                           |              |                               |
|---------------------------------------------|-----------------------------------------------------------------|---------------------|-------------|----------------|------|----------------|-----|-----------------|---------------------------|---------------|---------------------------|--------------|-------------------------------|
|                                             |                                                                 | Nemonoxacin         |             | Pipemidic acid |      | Nalidixic acid |     | Levofloxacin    |                           | Ciprofloxacin |                           | Moxifloxacin |                               |
| SOC, Safety concerns                        | Preferred Terms                                                 | W/P                 | ADR         | W/P            | ADR  | W/P            | ADR | W/P             | ADR                       | W/P           | ADR                       | W/P          | ADR                           |
| <b>Blood and lymphatic system disorders</b> |                                                                 |                     |             |                |      |                |     |                 |                           |               |                           |              |                               |
|                                             | Agranulocytosis                                                 |                     |             |                |      |                |     | USFDA           | USFDA-uncommon<br>UK-unk  | USFDA         | UK-Very Rare              | USFDA        | USFDA-PME<br>UK-Very Rare     |
|                                             | Anemia, including hemolytic and aplastic                        |                     |             |                |      |                |     | USFDA           | USFDA-PME<br>UK-unk       | USFDA         | UK-rare                   | USFDA        | USFDA-common<br>UK-uncommon   |
|                                             | Leukopenia                                                      |                     | TFDA-common |                | TFDA |                |     | USFDA           | UK-uncommon<br>USFDA-PME  | USFDA         | UK-rare                   | USFDA        | USFDA-uncommon<br>UK-uncommon |
|                                             | Pancytopenia                                                    |                     |             |                |      |                |     | USFDA           | USFDA-PME<br>UK-unk       | USFDA         | USFDA-PME<br>UK-Very Rare | USFDA        | USFDA-PME<br>UK-Very Rare     |
|                                             | Thrombocytopenia, including thrombotic thrombocytopenic purpura |                     |             |                | TFDA |                |     | USFDA           | USFDA-uncommon<br>UK-rare | USFDA         | UK-rare                   | USFDA        | USFDA-uncommon<br>UK-uncommon |
|                                             | Bone marrow depression                                          |                     |             |                |      |                |     |                 |                           |               | UK-Very Rare              |              |                               |
|                                             | Eosinophilia                                                    |                     |             |                |      |                |     |                 |                           |               | UK-uncommon               |              | USFDA-uncommon<br>UK-uncommon |
|                                             | Leucocytosis                                                    |                     |             |                |      |                |     |                 |                           |               |                           |              | USFDA-uncommon                |
|                                             | Methemoglobinemia                                               |                     |             |                |      |                |     |                 |                           |               | USFDA-PME                 |              |                               |
|                                             | Neutropenia                                                     |                     | TFDA-common |                |      |                |     |                 | UK-rare                   |               | UK-uncommon               |              | USFDA-uncommon<br>UK-uncommon |
| <b>Cardiac disorders</b>                    |                                                                 |                     |             |                |      |                |     |                 |                           |               |                           |              |                               |
|                                             | Torsade de pointes                                              | TFDA                |             |                |      |                |     | USFDA           | USFDA-PME<br>UK-unk       | USFDA/UK      | USFDA-PME                 | USFDA        | USFDA-PME<br>UK-Very Rare     |
|                                             | Angina Pectoris                                                 |                     |             |                |      |                |     |                 |                           |               | USFDA-uncommon            |              | USFDA-uncommon<br>UK-uncommon |

|                                    |                                                                                                                                                                                            |  |  |  |  |  |      |    |                           |  |                           |  |                               |    |  |                           |    |  |                               |
|------------------------------------|--------------------------------------------------------------------------------------------------------------------------------------------------------------------------------------------|--|--|--|--|--|------|----|---------------------------|--|---------------------------|--|-------------------------------|----|--|---------------------------|----|--|-------------------------------|
|                                    | Atrial fibrillation                                                                                                                                                                        |  |  |  |  |  |      |    |                           |  |                           |  | USFDA-uncommon<br>UK-uncommon |    |  |                           |    |  |                               |
|                                    | Bradycardia                                                                                                                                                                                |  |  |  |  |  |      |    |                           |  |                           |  | USFDA-uncommon                |    |  |                           |    |  |                               |
|                                    | Cardiac failure                                                                                                                                                                            |  |  |  |  |  |      |    |                           |  |                           |  | USFDA-uncommon                |    |  |                           |    |  |                               |
|                                    | Cardiac arrest                                                                                                                                                                             |  |  |  |  |  |      |    | USFDA-uncommon<br>UK-unk  |  | USFDA-uncommon            |  | USFDA-uncommon                |    |  |                           |    |  |                               |
|                                    | Myocardial Infarction                                                                                                                                                                      |  |  |  |  |  |      |    |                           |  | USFDA-uncommon            |  |                               |    |  |                           |    |  |                               |
|                                    | Palpitation                                                                                                                                                                                |  |  |  |  |  |      |    | USFDA-uncommon<br>UK-rare |  |                           |  | USFDA-uncommon<br>UK-uncommon |    |  |                           |    |  |                               |
|                                    | Tachycardia                                                                                                                                                                                |  |  |  |  |  |      |    | USFDA-PME<br>UK-rare      |  | USFDA-uncommon<br>UK-rare |  | USFDA-uncommon<br>UK-uncommon |    |  |                           |    |  |                               |
|                                    | Ventricular arrhythmia                                                                                                                                                                     |  |  |  |  |  |      |    | USFDA-uncommon            |  | USFDA-PME                 |  | USFDA-PME<br>UK-rare          |    |  |                           |    |  |                               |
|                                    | Ventricular tachycardia                                                                                                                                                                    |  |  |  |  |  |      |    | USFDA-uncommon<br>UK-unk  |  |                           |  |                               |    |  |                           |    |  |                               |
| <b>Eye disorders</b>               |                                                                                                                                                                                            |  |  |  |  |  |      |    |                           |  |                           |  |                               |    |  |                           |    |  |                               |
|                                    | <u>Vision disorders/<br/>vision disturbance<br/>(including<br/>diplopia, visual<br/>acuity reduced,<br/>vision blurred,<br/>transient vision<br/>loss, chromatopsia<br/>and photopsia)</u> |  |  |  |  |  | TFDA | UK |                           |  |                           |  | USFDA-PME<br>UK-rare          | UK |  | USFDA-uncommon<br>UK-rare | UK |  | USFDA-uncommon<br>UK-uncommon |
|                                    | Scotoma                                                                                                                                                                                    |  |  |  |  |  |      |    |                           |  |                           |  | USFDA-PME                     |    |  |                           |    |  |                               |
|                                    | Nystagmus                                                                                                                                                                                  |  |  |  |  |  |      |    |                           |  |                           |  | USFDA-PME                     |    |  |                           |    |  |                               |
|                                    | Uveitis/Uveitis and bilateral acute iris transillumination                                                                                                                                 |  |  |  |  |  |      |    |                           |  |                           |  | USFDA-PME                     |    |  |                           |    |  | UK-Very Rare                  |
|                                    | Retinal Detachment                                                                                                                                                                         |  |  |  |  |  |      |    |                           |  |                           |  |                               |    |  |                           |    |  |                               |
| <b>Ear and Labyrinth Disorders</b> |                                                                                                                                                                                            |  |  |  |  |  |      |    |                           |  |                           |  |                               |    |  |                           |    |  |                               |
|                                    | Hearing impaired                                                                                                                                                                           |  |  |  |  |  |      |    |                           |  |                           |  | UK-unk                        |    |  | UK-rare                   |    |  | USFDA-PME<br>UK-rare          |

|                                   |                                 |  |             |  |  |      |      |                               |    |                                |  |                               |
|-----------------------------------|---------------------------------|--|-------------|--|--|------|------|-------------------------------|----|--------------------------------|--|-------------------------------|
|                                   | Hearing loss                    |  |             |  |  |      |      | UK-unk                        |    | USFDA-uncommon<br>UK-rare      |  | USFDA-PME<br>UK-rare          |
|                                   | Hypoacusis                      |  |             |  |  |      |      | USFDA-PME                     |    |                                |  |                               |
|                                   | Tinnitus                        |  |             |  |  |      |      | USFDA-PME<br>UK-rare          |    | USFDA-uncommon<br>UK-rare      |  | USFDA-uncommon<br>UK-rare     |
|                                   | Vertigo                         |  |             |  |  | TFDA |      | USFDA-uncommon<br>UK-uncommon |    | UK-rare                        |  | USFDA-uncommon<br>UK-uncommon |
| <b>Gastrointestinal disorders</b> |                                 |  |             |  |  |      |      |                               |    |                                |  |                               |
|                                   | Severe and persistent diarrhoea |  |             |  |  |      |      |                               | UK |                                |  |                               |
|                                   | Diarrhoea                       |  | TFDA-common |  |  |      | TFDA | USFDA-common<br>UK-common     |    | USFDA-common<br>UK-common      |  | USFDA-common<br>UK-common     |
|                                   | Dry mouth                       |  |             |  |  |      |      |                               |    |                                |  | USFDA-uncommon                |
|                                   | Dysphagia                       |  |             |  |  |      |      |                               |    |                                |  | UK-rare                       |
|                                   | Esophagitis                     |  |             |  |  |      |      | USFDA-uncommon                |    |                                |  |                               |
|                                   | Gastritis                       |  |             |  |  |      |      | USFDA-uncommon                |    |                                |  | USFDA-uncommon<br>UK-uncommon |
|                                   | Gastroenteritis                 |  |             |  |  |      |      | USFDA-uncommon                |    |                                |  | USFDA-uncommon                |
|                                   | Gastroesophageal reflux disease |  |             |  |  |      |      |                               |    |                                |  | USFDA-uncommon                |
|                                   | Gastrointestinal Bleeding       |  |             |  |  |      |      |                               |    | USFDA-uncommon                 |  |                               |
|                                   | Glossitis                       |  |             |  |  |      |      | USFDA-uncommon                |    |                                |  |                               |
|                                   | Intestinal Perforation          |  |             |  |  |      |      |                               |    | USFDA-uncommon                 |  |                               |
|                                   | Pancreatitis                    |  |             |  |  |      |      | USFDA-uncommon<br>UK-unk      |    | USFDA-uncommon<br>UK-Very Rare |  |                               |
|                                   | Constipation                    |  |             |  |  |      |      | USFDA-common<br>UK-uncommon   |    |                                |  | USFDA-common<br>UK-uncommon   |
|                                   | Flatulence                      |  | TFDA-common |  |  |      | TFDA | UK-uncommon                   |    | UK-uncommon                    |  | USFDA-uncommon<br>UK-uncommon |

|                                    |                                                                                            |      |             |      |      |      |  |          |                             |          |                           |          |                               |
|------------------------------------|--------------------------------------------------------------------------------------------|------|-------------|------|------|------|--|----------|-----------------------------|----------|---------------------------|----------|-------------------------------|
|                                    | Stomatitis                                                                                 |      |             |      |      |      |  |          | USFDA-uncommon<br>UK-unk    |          |                           |          | UK-rare                       |
| <b>Hepatobiliary disorders</b>     |                                                                                            |      |             |      |      |      |  |          |                             |          |                           |          |                               |
| <i>Important potential risks</i>   | Hepatic necrosis or failure                                                                |      |             |      |      |      |  | USFDA    | USFDA-PME<br>UK-unk         | USFDA/UK | USFDA-PME                 | USFDA    | USFDA-PME<br>UK-Very Rare     |
|                                    | Hepatitis                                                                                  |      |             |      |      |      |  | USFDA    | USFDA-PME<br>UK-unk         | USFDA    | USFDA-uncommon<br>UK-rare | USFDA    | USFDA-PME<br>UK-rare          |
|                                    | Hepatotoxicity/Hepatobiliary disorders                                                     | TFDA |             |      |      |      |  | USFDA/UK |                             | USFDA    |                           | USFDA/UK |                               |
|                                    | Jaundice                                                                                   |      |             |      |      |      |  | USFDA    | USFDA-PME<br>UK-unk         | USFDA    |                           | USFDA    | USFDA-PME<br>UK-rare          |
|                                    | Abnormal hepatic function                                                                  |      |             |      |      |      |  |          | USFDA-uncommon              |          | USFDA-common              |          |                               |
|                                    | Cholestatic icterus                                                                        |      |             |      |      |      |  |          |                             |          | USFDA-UK-rare             |          |                               |
|                                    | Cholestatic Jaundice                                                                       |      |             |      |      |      |  |          |                             |          | USFDA-uncommon            |          |                               |
| <b>Infections and infestations</b> |                                                                                            |      |             |      |      |      |  |          |                             |          |                           |          |                               |
|                                    | Clostridium difficile-Associated Diarrhoea/ C. difficile colitis/ Pseudomembranous colitis | TFDA |             |      |      |      |  | USFDA/UK | USFDA-uncommon<br>UK-unk    | USFDA    |                           | USFDA/UK | UK-rare                       |
|                                    | Moniliasis/Fungal infection including Candida infection                                    |      |             |      |      |      |  |          | USFDA-common<br>UK-uncommon |          | USFDA-PME<br>UK-uncommon  |          | USFDA-uncommon<br>UK-common   |
|                                    | Vaginitis                                                                                  |      |             |      |      |      |  |          | USFDA-common                |          |                           |          |                               |
| <b>Investigations</b>              |                                                                                            |      |             |      |      |      |  |          |                             |          |                           |          |                               |
|                                    | Blood Glucose Disturbances/Dysglycaemia                                                    | TFDA |             | TFDA |      | TFDA |  | USFDA/UK |                             | USFDA/UK |                           | USFDA/UK |                               |
|                                    | Prolongation of the QT Interval/Torsades de Pointes                                        | TFDA |             |      |      |      |  | USFDA/UK | USFDA-PME<br>UK-unk         | USFDA/UK | USFDA-PME                 | USFDA/UK | USFDA-uncommon<br>UK-uncommon |
| <i>Important potential risks</i>   | Hepatic enzyme increased (including ALT/AST, alkaline phosphatase, GGT)                    |      | TFDA-common |      | TFDA |      |  |          | USFDA-uncommon<br>UK-common |          | UK-uncommon               |          | USFDA-common<br>UK-common     |

|                                |                                                 |      |  |  |      |  |  |          |                     |             |                                |                               |                           |
|--------------------------------|-------------------------------------------------|------|--|--|------|--|--|----------|---------------------|-------------|--------------------------------|-------------------------------|---------------------------|
|                                | Blood amylase increased                         |      |  |  |      |  |  |          |                     | UK-rare     |                                | USFDA-uncommon<br>UK-uncommon |                           |
|                                | Blood bilirubin increased                       |      |  |  | TFDA |  |  |          | UK-uncoomon         | UK-uncommon |                                | UK-uncommon                   |                           |
|                                | Blood creatinine increased                      |      |  |  | TFDA |  |  |          | UK-uncoomon         |             |                                | USFDA-uncommon                |                           |
|                                | Blood lactate dehydrogenase increased           |      |  |  |      |  |  |          |                     |             |                                | USFDA-uncommon<br>UK-uncommon |                           |
|                                | Blood triglycerides increased                   |      |  |  |      |  |  |          |                     |             |                                | USFDA-uncommon                |                           |
|                                | Blood urea increased                            |      |  |  |      |  |  |          |                     |             |                                | USFDA-uncommon                |                           |
|                                | Blood uric acid increased                       |      |  |  |      |  |  |          |                     |             |                                | USFDA-uncommon                |                           |
|                                | Cholesterol elevation (serum)                   |      |  |  |      |  |  |          |                     | USFDA-PME   |                                |                               |                           |
|                                | Lipase increased                                |      |  |  |      |  |  |          |                     |             |                                | USFDA-uncommon                |                           |
|                                | Haematocrit decreased                           |      |  |  |      |  |  |          |                     |             |                                | USFDA-uncommon                |                           |
|                                | Prothrombin level increased                     |      |  |  |      |  |  |          |                     |             |                                | UK-Very Rare                  |                           |
|                                | Prothrombin time prolonged                      |      |  |  |      |  |  |          | USFDA-PME           | USFDA-PME   |                                | USFDA-uncommon<br>UK-uncommon |                           |
|                                | International normalized ratio prolonged        |      |  |  |      |  |  |          | USFDA-PME           |             |                                |                               |                           |
|                                | Activated partial thromboplastin time prolonged |      |  |  |      |  |  |          |                     |             |                                | USFDA-uncommon                |                           |
| <b>Immune system disorders</b> |                                                 |      |  |  |      |  |  |          |                     |             |                                |                               |                           |
|                                | Stevens-Johnson Syndrome                        | TFDA |  |  | TFDA |  |  | USFDA/UK | USFDA-PME<br>UK-unk | USFDA       | USFDA-uncommon<br>UK-Very Rare | USFDA/UK                      | USFDA-PME<br>UK-Very Rare |
|                                | Toxic epidermal necrolysis                      | TFDA |  |  | TFDA |  |  | USFDA/UK | USFDA-PME<br>UK-unk | USFDA       | USFDA-uncommon<br>UK-Very Rare | USFDA                         | USFDA-PME<br>UK-Very Rare |
|                                | Allergic pneumonitis                            |      |  |  |      |  |  | USFDA    | USFDA-PME<br>UK-unk | USFDA       |                                | USFDA                         | USFDA-PME                 |

|                                                        |                                                                                                                                                         |      |  |      |      |      |          |                                    |          |                                    |          |                                         |
|--------------------------------------------------------|---------------------------------------------------------------------------------------------------------------------------------------------------------|------|--|------|------|------|----------|------------------------------------|----------|------------------------------------|----------|-----------------------------------------|
|                                                        | <b>Hypersensitivity Reactions/Allergic reaction (including: anaphylactic/anaphylactoid reactions, anaphylactic shock, Angioedema, Laryngeal Oedema)</b> | TFDA |  |      | TFDA | TFDA | USFDA/UK | USFDA-PME UK-rare/UK-unk           | USFDA/UK | USFDA-uncommon UK-rare             | USFDA/UK | USFDA-PME UK-uncommon                   |
|                                                        | <b>Serum sickness</b>                                                                                                                                   |      |  |      |      |      | USFDA    | USFDA-PME                          | USFDA    | USFDA-PME UK-Very Rare             | USFDA/UK |                                         |
| <b>Musculoskeletal and connective tissue disorders</b> |                                                                                                                                                         |      |  |      |      |      |          |                                    |          |                                    |          |                                         |
|                                                        | <b>Exacerbation of Myasthenia Gravis</b>                                                                                                                | TFDA |  | TFDA | TFDA |      | USFDA/UK | USFDA-PME UK-rare                  | USFDA/UK | USFDA-PME                          | USFDA/UK | USFDA-PME UK-Very Rare                  |
| <b>Important identified risks</b>                      | <b>Tendinitis and Tendon Rupture</b>                                                                                                                    | TFDA |  | TFDA | TFDA | TFDA | USFDA/UK | USFDA-PME UK-rare                  | USFDA/UK | USFDA-PME UK-Very Rare             | USFDA/UK | USFDA-PME UK-rare/UK-Very Rare          |
|                                                        | <b>Musculoskeletal Disorders/Arthropathic Effects (arthropathy, arthralgia, arthritis, myalgia, tendinopathy, and gait abnormality)</b>                 |      |  |      |      |      | USFDA    | USFDA-uncommon UK-uncommon/UK-rare | USFDA    | USFDA-uncommon UK-uncommon/UK-rare | USFDA    | USFDA-uncommon UK-uncommon/UK-Very Rare |
|                                                        | <b>Rhabdomyolysis</b>                                                                                                                                   |      |  |      |      |      |          | USFDA-PME UK-unk                   |          |                                    |          | UK-unk                                  |
|                                                        | <b>Increased muscle tone and cramping</b>                                                                                                               |      |  |      |      |      |          |                                    |          | UK-rare                            |          | UK-rare                                 |
|                                                        | <b>Joint Stiffness</b>                                                                                                                                  |      |  |      |      |      |          |                                    |          | USFDA-uncommon                     |          |                                         |
|                                                        | <b>Ligament rupture</b>                                                                                                                                 |      |  |      |      |      |          | UK-unk                             |          |                                    |          |                                         |
|                                                        | <b>Myoclonus</b>                                                                                                                                        |      |  |      |      |      |          |                                    |          | USFDA-PME                          |          |                                         |
|                                                        | <b>Muscle enzymes increased</b>                                                                                                                         |      |  |      |      |      |          | USFDA-PME                          |          |                                    |          |                                         |
|                                                        | <b>Muscle injury, including rupture</b>                                                                                                                 |      |  |      |      |      |          | USFDA-PME/UK-unk                   |          |                                    |          |                                         |



|                                 |                                                                                                                                                                            |      |  |      |  |      |  |          |                               |          |                                                     |          |                                       |
|---------------------------------|----------------------------------------------------------------------------------------------------------------------------------------------------------------------------|------|--|------|--|------|--|----------|-------------------------------|----------|-----------------------------------------------------|----------|---------------------------------------|
|                                 | Twitching                                                                                                                                                                  |      |  |      |  |      |  |          |                               |          | USFDA-PME                                           |          | UK-rare                               |
| <b>Nervous system disorders</b> |                                                                                                                                                                            |      |  |      |  |      |  |          |                               |          |                                                     |          |                                       |
|                                 | <u>Central Nervous System Adverse Reactions</u><br>(seizures (convulsions), increased intracranial pressure (including pseudotumor cerebri), tremors, and light-headedness | TFDA |  | TFDA |  | TFDA |  | USFDA    | USFDA-uncommon<br>UK-uncommon | USFDA/UK | USFDA-uncommon<br>USFDA-PME<br>UK-rare/UK-Very Rare | USFDA/UK | USFDA-uncommon<br>UK-uncommon/UK-rare |
|                                 | Peripheral Neuropathy/polyneuropathy                                                                                                                                       | TFDA |  |      |  |      |  | USFDA/UK | UK-unk                        | USFDA/UK | USFDA-PME                                           | USFDA/UK | USFDA-PME<br>UK-rare                  |
|                                 | Ageusia/Taste disorders/<br>Bad Taste/Taste loss                                                                                                                           |      |  |      |  |      |  |          | UK-unk                        |          | USFDA-uncommon<br>UK-uncommon                       |          | UK-uncommon                           |
|                                 | Anosmia (smell blindness)                                                                                                                                                  |      |  |      |  |      |  |          | USFDA-PME/UK-unk              |          | USFDA-PME                                           |          | UK-rare                               |
|                                 | Ataxia                                                                                                                                                                     |      |  |      |  |      |  |          |                               |          | USFDA-uncommon                                      |          |                                       |
|                                 | Benign intracranial hypertension                                                                                                                                           |      |  |      |  |      |  |          | UK-unk                        |          | UK-Very Rare                                        |          |                                       |
|                                 | Dysgeusia                                                                                                                                                                  |      |  |      |  |      |  |          | USFDA-PME<br>UK-uncommon      |          |                                                     |          | USFDA-uncommon                        |
|                                 | Disturbed coordination                                                                                                                                                     |      |  |      |  |      |  |          |                               |          | UK-Very Rare                                        |          | USFDA-PME<br>UK-rare                  |
|                                 | Dyskinesia                                                                                                                                                                 |      |  |      |  |      |  |          | UK-unk                        |          |                                                     |          |                                       |
|                                 | Extrapyramidal disorder                                                                                                                                                    |      |  |      |  |      |  |          | UK-unk                        |          |                                                     |          |                                       |
|                                 | Encephalopathy                                                                                                                                                             |      |  |      |  |      |  |          | USFDA-PME                     |          |                                                     |          |                                       |
|                                 | Hypertonia                                                                                                                                                                 |      |  |      |  |      |  |          | USFDA-uncommon                |          | USFDA-PME                                           |          |                                       |
|                                 | Hyperkinesia                                                                                                                                                               |      |  |      |  |      |  |          | USFDA-uncommon                |          |                                                     |          |                                       |
|                                 | Hyperaesthesia                                                                                                                                                             |      |  |      |  |      |  |          |                               |          |                                                     |          | UK-Very Rare                          |
|                                 | Hypoesthesia                                                                                                                                                               |      |  |      |  |      |  |          |                               |          |                                                     |          | USFDA-uncommon<br>UK-rare             |

|                              |                                                                                                                                                                                                                                                                                                                              |      |  |      |  |      |      |          |                                  |          |                                      |          |                               |
|------------------------------|------------------------------------------------------------------------------------------------------------------------------------------------------------------------------------------------------------------------------------------------------------------------------------------------------------------------------|------|--|------|--|------|------|----------|----------------------------------|----------|--------------------------------------|----------|-------------------------------|
|                              | Olfactory nerve disorders                                                                                                                                                                                                                                                                                                    |      |  |      |  |      |      |          |                                  |          | UK-Very Rare                         |          |                               |
|                              | Paraesthesia                                                                                                                                                                                                                                                                                                                 |      |  |      |  |      |      |          | USFDA-uncommon<br>UK-rare        |          | USFDA-uncommon<br>UK-rare            |          | USFDA-uncommon<br>UK-uncommon |
|                              | Parosmia                                                                                                                                                                                                                                                                                                                     |      |  |      |  |      |      |          | USFDA-PME<br>UK-unk              |          |                                      |          |                               |
|                              | Pseudotumor cerebri                                                                                                                                                                                                                                                                                                          |      |  |      |  |      |      |          | USFDA-PME                        |          |                                      |          |                               |
|                              | Speech disorders                                                                                                                                                                                                                                                                                                             |      |  |      |  |      |      |          |                                  |          |                                      |          | UK-rare                       |
|                              | Syncope                                                                                                                                                                                                                                                                                                                      |      |  |      |  |      | TFDA |          | USFDA-uncommon<br>UK-unk         |          | USFDA-uncommon<br>UK-rare            |          | USFDA-uncommon<br>UK-rare     |
| <b>Psychiatric disorders</b> |                                                                                                                                                                                                                                                                                                                              |      |  |      |  |      |      |          |                                  |          |                                      |          |                               |
|                              | <u>Psychiatric Adverse Reactions</u><br>(toxic psychoses, hallucinations, or paranoia; depression, or suicidal thoughts/self-endangering behaviour; anxiety, agitation, restlessness, or nervousness; confusion, delirium, disorientation, or disturbances in attention; insomnia or nightmares; memory impairment, Amnesia) | TFDA |  | TFDA |  | TFDA |      | USFDA/UK | USFDA-uncommon<br>UK-rare/UK-unk | USFDA/UK | USFDA-PME<br>UK-uncommon/<br>UK-rare | USFDA/UK | USFDA-PME<br>UK-Very Rare     |
|                              | Abnormal dreaming                                                                                                                                                                                                                                                                                                            |      |  |      |  |      |      |          | USFDA-uncommon<br>UK-rare        |          | UK-rare                              |          | UK-rare                       |
|                              | Abnormal electroencephalogram (EEG)                                                                                                                                                                                                                                                                                          |      |  |      |  |      |      |          | USFDA-PME                        |          |                                      |          |                               |
|                              | Anorexia                                                                                                                                                                                                                                                                                                                     |      |  |      |  |      |      |          | USFDA-uncommon<br>UK-uncommon    |          | USFDA-uncommon<br>UK-uncommon        |          | USFDA-uncommon<br>UK-uncommon |

|                                               |                                                                               |      |  |      |      |      |  |          |                           |          |                           |          |                           |
|-----------------------------------------------|-------------------------------------------------------------------------------|------|--|------|------|------|--|----------|---------------------------|----------|---------------------------|----------|---------------------------|
|                                               | Depersonalization                                                             |      |  |      |      |      |  |          |                           |          | USFDA-uncommon            |          | UK-Very Rare              |
|                                               | Irritability                                                                  |      |  |      |      |      |  |          |                           |          | USFDA-uncommon            |          |                           |
|                                               | Manic Reaction                                                                |      |  |      |      |      |  |          |                           |          | USFDA-uncommon<br>UK-unk  |          |                           |
|                                               | Paranoia                                                                      |      |  |      |      |      |  |          | USFDA-PME                 |          | USFDA-uncommon            |          |                           |
|                                               | Phobia                                                                        |      |  |      |      |      |  |          |                           |          | USFDA-uncommon            |          |                           |
|                                               | Psychosis                                                                     |      |  |      |      |      |  |          | USFDA-PME                 |          | USFDA-uncommon            |          |                           |
| <b>Renal and urinary disorders</b>            |                                                                               |      |  |      |      |      |  |          |                           |          |                           |          |                           |
|                                               | Acute renal insufficiency or failure                                          |      |  |      | TFDA |      |  | USFDA    | USFDA-uncommon<br>UK-rare | USFDA    | USFDA-uncommon<br>UK-rare | USFDA    | USFDA-uncommon<br>UK-rare |
|                                               | Interstitial nephritis                                                        |      |  |      |      |      |  | USFDA    |                           | USFDA    | USFDA-uncommon            | USFDA    | USFDA-PME                 |
|                                               | Crystalluria                                                                  |      |  |      |      |      |  |          |                           | USFDA/UK |                           |          |                           |
|                                               | Abnormal renal function                                                       |      |  |      |      |      |  |          | USFDA-uncommon            |          |                           |          | UK-rare                   |
|                                               | Dysuria                                                                       |      |  |      |      |      |  |          |                           |          |                           |          | USFDA-uncommon            |
|                                               | Haematuria                                                                    |      |  |      |      |      |  |          |                           |          |                           | UK-rare  |                           |
|                                               | Tubulointerstitial nephritis                                                  |      |  |      |      |      |  |          |                           |          |                           | UK-rare  |                           |
| <b>Social circumstances</b>                   |                                                                               |      |  |      |      |      |  |          |                           |          |                           |          |                           |
| <i>Important identified risks</i>             | Disabling and Potentially Irreversible Serious Adverse Reactions (Disability) | TFDA |  | TFDA |      | TFDA |  | USFDA/UK |                           | USFDA/UK |                           | USFDA/UK |                           |
| <b>Skin and subcutaneous tissue disorders</b> |                                                                               |      |  |      |      |      |  |          |                           |          |                           |          |                           |
|                                               | Photosensitivity/Phototoxicity                                                | TFDA |  |      | TFDA |      |  | USFDA/UK | USFDA-PME<br>UK-unk       | USFDA/UK | USFDA-uncommon            | USFDA/UK | USFDA-PME<br>UK-rare      |
|                                               | Acute Generalized Exanthematous Pustulosis (AGEP)                             |      |  |      |      |      |  |          | USFDA-PME                 |          | USFDA-PME<br>UK-unk       |          | UK-unk                    |
|                                               | Drug reaction with eosinophilia and systemic                                  |      |  |      |      |      |  | UK       | UK-rare                   |          | UK-unk                    |          |                           |

|                                  |                                |  |  |  |      |  |      |                      |  |          |                                |          |                               |
|----------------------------------|--------------------------------|--|--|--|------|--|------|----------------------|--|----------|--------------------------------|----------|-------------------------------|
|                                  | <b>symptoms (DRESS)</b>        |  |  |  |      |  |      |                      |  |          |                                |          |                               |
|                                  | Dry skin                       |  |  |  |      |  |      |                      |  |          |                                |          | UK-uncommon                   |
|                                  | Erythema multiforme            |  |  |  |      |  |      | USFDA-PME<br>UK-unk  |  |          | USFDA-uncommon<br>UK-Very Rare |          | USFDA-uncommon                |
|                                  | Erythema Nodosum               |  |  |  |      |  |      |                      |  |          | USFDA-uncommon<br>UK-Very Rare |          |                               |
|                                  | Fixed drug eruptions           |  |  |  |      |  |      | USFDA-PME<br>UK-rare |  |          | USFDA-PME                      |          |                               |
|                                  | Flushing                       |  |  |  | TFDA |  | TFDA |                      |  |          | USFDA-uncommon                 |          |                               |
|                                  | Urticaria                      |  |  |  | TFDA |  | TFDA | USFDA-uncommon       |  |          | USFDA-uncommon<br>UK-uncommon  |          | USFDA-uncommon<br>UK-uncommon |
|                                  | Hyperhidrosis                  |  |  |  |      |  |      | UK-uncoomon          |  |          |                                |          | USFDA-uncommon                |
| <b>Vascular disorders</b>        |                                |  |  |  |      |  |      |                      |  |          |                                |          |                               |
| <i>Important potential risks</i> | Aortic Aneurysm and Dissection |  |  |  |      |  |      | USFDA/UK             |  | USFDA/UK |                                | USFDA/UK |                               |
|                                  | Vasculitis                     |  |  |  |      |  |      | USFDA                |  | USFDA    | USFDA-PME<br>UK-Very Rare      | USFDA    | UK-Very Rare                  |
|                                  | Hypertension                   |  |  |  |      |  |      |                      |  |          |                                |          | USFDA-uncommon<br>UK-rare     |
|                                  | Hypotension                    |  |  |  |      |  |      | UK-rare              |  |          | USFDA-uncommon<br>UK-rare      |          | USFDA-uncommon<br>UK-rare     |
|                                  | Leucocytoclastic vasculitis    |  |  |  |      |  |      | USFDA-PME<br>UK-unk  |  |          |                                |          |                               |
|                                  | Petechia                       |  |  |  |      |  |      |                      |  |          | USFDA-uncommon<br>UK-Very Rare |          |                               |
|                                  | Phlebitis                      |  |  |  |      |  |      | USFDA-uncommon       |  |          |                                |          | USFDA-uncommon                |
|                                  | Vasodilatation                 |  |  |  |      |  |      | USFDA-PME            |  |          | UK-rare                        |          | UK-uncommon                   |

**General Disorders and Administration Site Conditions**

|  |                                                              |  |             |  |  |  |      |  |                               |  |                                |  |                               |
|--|--------------------------------------------------------------|--|-------------|--|--|--|------|--|-------------------------------|--|--------------------------------|--|-------------------------------|
|  | <b>Chills</b>                                                |  |             |  |  |  |      |  |                               |  |                                |  | USFDA-uncommon                |
|  | <b>Oedema</b>                                                |  |             |  |  |  |      |  | USFDA-common                  |  | UK-rare                        |  | USFDA-uncommon<br>UK-rare     |
|  | <b>Infusion site extravasation</b>                           |  |             |  |  |  |      |  |                               |  |                                |  | USFDA-uncommon                |
|  | <b>Injection site reaction</b>                               |  |             |  |  |  |      |  | USFDA-common                  |  |                                |  |                               |
|  | <b>Multi-organ failure</b>                                   |  |             |  |  |  |      |  | USFDA-PME                     |  |                                |  |                               |
|  | <b>Asthenia</b>                                              |  |             |  |  |  |      |  | UK-uncommon                   |  |                                |  | USFDA-uncommon                |
|  | <b>Chest pain</b>                                            |  |             |  |  |  |      |  | USFDA-common                  |  |                                |  | USFDA-uncommon                |
|  | <b>Dizziness</b>                                             |  | TFDA-common |  |  |  | TFDA |  | USFDA-common<br>UK-common     |  | USFDA-uncommon<br>UK-uncommon  |  | USFDA-common<br>UK-common     |
|  | <b>Dyspepsia</b>                                             |  |             |  |  |  |      |  | USFDA-common<br>UK-uncommon   |  | UK-uncommon                    |  | USFDA-common<br>UK-uncommon   |
|  | <b>Headache</b>                                              |  | TFDA-common |  |  |  | TFDA |  | USFDA-common<br>UK-common     |  | USFDA-uncommon<br>UK-uncommon  |  | USFDA-common<br>UK-common     |
|  | <b>Lethargy</b>                                              |  |             |  |  |  | TFDA |  |                               |  |                                |  | USFDA-uncommon                |
|  | <b>Migraine</b>                                              |  |             |  |  |  |      |  |                               |  | USFDA-uncommon<br>UK-Very Rare |  |                               |
|  | <b>Nausea</b>                                                |  | TFDA-common |  |  |  | TFDA |  | USFDA-common<br>UK-common     |  | USFDA-common<br>UK-common      |  | USFDA-common<br>UK-common     |
|  | <b>Pain (including pain in back, chest, and extremities)</b> |  |             |  |  |  |      |  | UK-unk                        |  | USFDA-common<br>UK-uncommon    |  | USFDA-uncommon<br>UK-uncommon |
|  | <b>Pyrexia</b>                                               |  |             |  |  |  |      |  | USFDA-PME<br>UK-rare          |  |                                |  | USFDA-common                  |
|  | <b>Somnolence</b>                                            |  |             |  |  |  | TFDA |  | USFDA-uncommon<br>UK-uncommon |  |                                |  | USFDA-uncommon<br>UK-uncommon |

|                                                         |                                                                     |  |             |  |  |  |  |  |                             |  |                             |  |                               |
|---------------------------------------------------------|---------------------------------------------------------------------|--|-------------|--|--|--|--|--|-----------------------------|--|-----------------------------|--|-------------------------------|
|                                                         | Sweating                                                            |  |             |  |  |  |  |  |                             |  | USFDA-uncommon<br>UK-rare   |  | USFDA-uncommon<br>UK-uncommon |
|                                                         | Vomiting                                                            |  | TFDA-common |  |  |  |  |  | USFDA-common<br>UK-common   |  | USFDA-common<br>UK-uncommon |  | USFDA-common<br>UK-common     |
| <b>Respiratory, Thoracic, and Mediastinal Disorders</b> |                                                                     |  |             |  |  |  |  |  |                             |  |                             |  |                               |
|                                                         | Asthma                                                              |  |             |  |  |  |  |  |                             |  |                             |  | USFDA-uncommon                |
|                                                         | Bronchospasm                                                        |  |             |  |  |  |  |  | UK-unk                      |  | USFDA-uncommon              |  | USFDA-uncommon                |
|                                                         | Dyspnoea                                                            |  |             |  |  |  |  |  | USFDA-common<br>UK-uncommon |  | USFDA-uncommon<br>UK-rare   |  | USFDA-uncommon<br>UK-uncommon |
|                                                         | Epistaxis                                                           |  |             |  |  |  |  |  | USFDA-uncommon              |  |                             |  |                               |
|                                                         | Haemoptysis                                                         |  |             |  |  |  |  |  |                             |  | USFDA-uncommon              |  |                               |
|                                                         | Wheezing                                                            |  |             |  |  |  |  |  |                             |  |                             |  | USFDA-uncommon                |
| <b>Metabolism and nutrition disorders</b>               |                                                                     |  |             |  |  |  |  |  |                             |  |                             |  |                               |
|                                                         | Syndrome of inappropriate secretion of antidiuretic hormone (SIADH) |  |             |  |  |  |  |  | UK-rare                     |  | UK-unk                      |  | UK-Very Rare                  |
|                                                         | Dehydration                                                         |  |             |  |  |  |  |  |                             |  |                             |  | USFDA-uncommon<br>UK-uncommon |
|                                                         | Hyperglycaemia                                                      |  |             |  |  |  |  |  | USFDA-uncommon<br>UK-unk    |  | USFDA-uncommon<br>UK-rare   |  | USFDA-uncommon<br>UK-rare     |
|                                                         | Hypoglycaemic coma                                                  |  |             |  |  |  |  |  | UK-unk                      |  |                             |  | UK-Very Rare                  |
|                                                         | Hypoglycaemia                                                       |  |             |  |  |  |  |  | USFDA-uncommon<br>UK-rare   |  | USFDA-uncommon              |  | UK-Very Rare                  |
|                                                         | Hyperkalaemia                                                       |  |             |  |  |  |  |  | USFDA-uncommon              |  | USFDA-PME                   |  |                               |
|                                                         | Hyperuricaemia                                                      |  |             |  |  |  |  |  |                             |  |                             |  | UK-rare                       |
|                                                         | Hyperlipidaemia                                                     |  |             |  |  |  |  |  |                             |  |                             |  | USFDA-uncommon<br>UK-uncommon |

| <b>Frequencies of Adverse Reaction</b> |                                 |               |             |
|----------------------------------------|---------------------------------|---------------|-------------|
|                                        | <b>USFDA</b>                    | <b>UK</b>     | <b>TFDA</b> |
| ≥1/100 to <1/10                        | Common                          | Common        | Common      |
| ≥1/1,000 to <1/100                     | Uncommon                        | Uncommon      | x           |
| ≥1/10,000 to <1/1,000                  | x                               | Rare          | x           |
| < 1/10,000                             | x                               | Very Rare     | x           |
| other                                  | Post marketing Experience (PME) | Unknown (unk) | x           |

| <b>Reference</b> |                                                                                                                             |
|------------------|-----------------------------------------------------------------------------------------------------------------------------|
| Nemonoxacin      | TFDA (Taigexyn <sup>®</sup> , 2020/01)                                                                                      |
| Pipemidic acid   | TFDA (Dolcol <sup>®</sup> , 2019/04)                                                                                        |
| Nalidixic acid   | TFDA (Nagamin <sup>®</sup> , 2019/05)                                                                                       |
| Levofloxacin     | USFDA (Levaquin <sup>®</sup> , 2018/10), UK (Levofloxacin <sup>®</sup> , 2019/11), EU-RMP (Quinsair <sup>®</sup> , 2020/02) |
| Ciprofloxacin    | USFDA (Cipro <sup>®</sup> , 2020/05), UK (Ciproxin <sup>®</sup> , 2019/11)                                                  |
| Moxifloxacin     | USFDA (Avelox <sup>®</sup> , 2020/05), UK (Avelox <sup>®</sup> , 2020/14)                                                   |

**Supplementary Table 6. Examples of different types of alerts**

| <b>Types of alerts</b>   | <b>Abbreviation</b> | <b>Example alerts in SGLT2i instance</b>                                                                                                                             | <b>Example alerts in NFQ instance</b>                                                                                                                                                                               |
|--------------------------|---------------------|----------------------------------------------------------------------------------------------------------------------------------------------------------------------|---------------------------------------------------------------------------------------------------------------------------------------------------------------------------------------------------------------------|
| ADR                      | ADR                 | Genitourinary tract infections                                                                                                                                       | Diarrhea                                                                                                                                                                                                            |
| ADR-related event        | ADRr                | Anogenital pruritus, which is not listed as an ADR in the risk profile of SGLT2i but is likely caused by genitourinary tract infections following the use of SGLT2i. | Unspecified functional disorder of the intestine; this diagnosis may result from gastrointestinal discomfort related to use of NFQ, however it is not documented as ADR on the drug label.                          |
| Indication               | I                   | Diabetes                                                                                                                                                             | Acute sinusitis                                                                                                                                                                                                     |
| Indication-related event | Ir                  | Cardiovascular diseases (CVDs); some SGLT2is have been shown to decrease risk of CVDs, thus are more likely to be prescribed in patients with CVD.                   | Acute bronchiolitis; this event is commonly diagnosed with respiratory infection which is one of the clinical indications of NFQ.                                                                                   |
| Cohort-related event     | CH                  | Obesity; many patients with type 2 diabetes are obese or have related risk factors.                                                                                  | Complications of the puerperium; NFQ is likely to be prescribed for patients with genitourinary infections, which are frequently encountered in pregnant women.                                                     |
| Protopathic bias         | PT                  | (Not likely to find any because SGLT2is are seldom used for treating symptoms of any diseases.)                                                                      | Benign neoplasm of the bladder; patients with bladder tumour may have presented symptoms mimicking genitourinary infections (e.g., cystitis) and were prescribed NFQ before the confirmation of the true diagnosis. |



## References

1. Tsiropoulos I, Andersen M, Hallas J. Adverse events with use of antiepileptic drugs: a prescription and event symmetry analysis. *Pharmacoepidemiology and drug safety*. 2009 Jun;18(6):483-91.
2. Morris JA, Gardner MJ. Calculating confidence intervals for relative risks (odds ratios) and standardised ratios and rates. *British medical journal (Clinical research ed)*. 1988 May 7;296(6632):1313-6.
3. Hallas J. Evidence of depression provoked by cardiovascular medication: a prescription sequence symmetry analysis. *Epidemiology (Cambridge, Mass)*. 1996 Sep;7(5):478-84.
4. Lai EC, Pratt N, Hsieh CY, Lin SJ, Pottegård A, Roughead EE, et al. Sequence symmetry analysis in pharmacovigilance and pharmacoepidemiologic studies. *European journal of epidemiology*. 2017 Jul;32(7):567-82.
5. Kulldorff M, Dashevsky I, Avery TR, Chan AK, Davis RL, Graham D, et al. Drug safety data mining with a tree-based scan statistic. *Pharmacoepidemiology and drug safety*. 2013 May;22(5):517-23.
6. Wang SV, Maro JC, Baro E, Izem R, Dashevsky I, Rogers JR, et al. Data Mining for Adverse Drug Events With a Propensity Score-matched Tree-based Scan Statistic. *Epidemiology (Cambridge, Mass)*. 2018 Nov;29(6):895-903.
